# Supplementary material for: Are there sleep-specific phenotypes in patients with chronic fatigue syndrome? A cross-sectional polysomnography analysis
Source: PubMed Central journal article supplement — BMJ Open. 2013 May 31;3(6):e002999. doi: 10.1136/bmjopen-2013-002999 (PMC3669720; doi:10.1136/bmjopen-2013-002999), 2013-05-31
Supplement: bmjopen-2013-002999.draft_revisions.pdf [file bmjopen-2013-002999.draft_revisions.pdf]

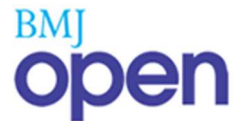

**Are there sleep-specific phenotypes in patients with Chronic Fatigue Syndrome? A cross-sectional polysomnography analysis**

|                                 |                                                                                                                                                                                                                                                                                                                                                                                                                                            |
|---------------------------------|--------------------------------------------------------------------------------------------------------------------------------------------------------------------------------------------------------------------------------------------------------------------------------------------------------------------------------------------------------------------------------------------------------------------------------------------|
| Journal:                        | <i>BMJ Open</i>                                                                                                                                                                                                                                                                                                                                                                                                                            |
| Manuscript ID:                  | bmjopen-2013-002999                                                                                                                                                                                                                                                                                                                                                                                                                        |
| Article Type:                   | Research                                                                                                                                                                                                                                                                                                                                                                                                                                   |
| Date Submitted by the Author:   | 05-Apr-2013                                                                                                                                                                                                                                                                                                                                                                                                                                |
| Complete List of Authors:       | Gotts, Zoe; Northumbria University, Northumbria Centre for Sleep Research<br>Deary, Vincent; Northumbria University, Psychology<br>Newton, Julia; Newcastle University, Institute for Ageing and Health<br>van der Dussen, Donna; VermoeidheidCentrum Nederland bv, Fatigue Service<br>de Roy, Pierre; VermoeidheidCentrum Nederland bv, Fatigue Service<br>Ellis, Jason; University of Northumbria, Northumbria Centre for Sleep Research |
| <b>Primary Subject Heading</b>: | Patient-centred medicine                                                                                                                                                                                                                                                                                                                                                                                                                   |
| Secondary Subject Heading:      | Patient-centred medicine, General practice / Family practice, Evidence based practice                                                                                                                                                                                                                                                                                                                                                      |
| Keywords:                       | INTERNAL MEDICINE, SLEEP MEDICINE, STATISTICS & RESEARCH METHODS, MENTAL HEALTH                                                                                                                                                                                                                                                                                                                                                            |
|                                 |                                                                                                                                                                                                                                                                                                                                                                                                                                            |

SCHOLARONE™  
Manuscripts

1  
2  
3 Are there sleep-specific phenotypes in patients with Chronic Fatigue Syndrome? A cross-sectional  
4  
5 Polysomnography analysis  
6  
7  
8

9 Zoe M. Gotts MSc<sup>a</sup>, Vincent Deary PhD<sup>a</sup>, Julia Newton MD<sup>b</sup>, Donna van der Dussen MD<sup>c</sup>, Pierre de  
10  
11 Roy MD<sup>c</sup>, Jason G. Ellis PhD<sup>a\*</sup>  
12  
13

14  
15  
16 \* Corresponding Author

17 Dr Jason G Ellis

18 Northumbria Centre for Sleep Research

19 School of Life Sciences

20 Northumbria University

21 138 Northumberland Building

22 Newcastle-upon-Tyne

23 NE1 8ST

24 [Jason.ellis@northumbria.ac.uk](mailto:Jason.ellis@northumbria.ac.uk)

25 +44(0)1912273081  
26  
27  
28  
29  
30  
31  
32  
33  
34  
35  
36  
37

- 38 a) Northumbria Centre for Sleep Research, Northumbria University, Newcastle, UK  
39 b) Institute for Ageing and Health, Newcastle University, Newcastle, UK  
40 c) VermoeidheidCentrum Nederland bv, Lelystad, Netherlands  
41  
42  
43  
44  
45  
46  
47  
48  
49  
50  
51  
52  
53  
54  
55  
56  
57  
58  
59  
60

1  
2  
3 ABSTRACT  
4

5  
6 Objectives: Despite sleep disturbances being a central complaint in patients with Chronic Fatigue  
7  
8 Syndrome (CFS), evidence of objective sleep abnormalities, from over 30 studies, is inconsistent. The  
9  
10 present study aimed to identify whether sleep-specific phenotypes exist in CFS and explore objective  
11  
12 characteristics that could differentiate phenotypes, whilst also being relevant to routine clinical  
13  
14 practice.  
15

16  
17  
18 Design: A cross-sectional, single-site, study.  
19

20  
21 Setting: A fatigue clinic in the Netherlands  
22

23  
24 Participants: A consecutive series of 343 'otherwise healthy' patients meeting criteria for CFS,  
25  
26 according to the Fukuda definition.  
27

28  
29 Measures: Patients underwent a single night of polysomnography (all-night recording of  
30  
31 Electroencephalography, Electromyography, Electrooculography, Electrocardiogram and Respiration)  
32  
33 that were hand-scored by a researcher blind to diagnosis and patient history.  
34

35  
36  
37 Results: Of the 343 patients, 104 (30.3%) were identified with a Primary Sleep Disorder explaining  
38  
39 their diagnosis. A hierarchical cluster analysis on the remaining 239 patients resulted in four sleep  
40  
41 phenotypes identified at saturation. Of the 239 patients, 89.1% met quantitative criteria for at least  
42  
43 one objective sleep problem. A one-way ANOVA confirmed distinct sleep profiles for each sleep  
44  
45 phenotype. Relatively longer sleep onset latencies, longer REM latencies, and smaller percentages of  
46  
47 both Stage 2 and REM characterized the first phenotype. The second phenotype was characterised  
48  
49 by more frequent arousals per hour. The third phenotype was characterised by a longer Total Sleep  
50  
51 Time, shorter REM Latencies, and a higher percentage of REM and low percentage of wake time. The  
52  
53 final phenotype had the shortest Total Sleep Time and the highest percentage of wake time and  
54  
55 wake after sleep onset.  
56  
57

1  
2  
3  
4  
5  
6  
7  
8  
9  
10  
11  
12  
13  
14  
15  
16  
17  
18  
19  
20  
21  
22  
23  
24  
25  
26  
27  
28  
29  
30  
31  
32  
33  
34  
35  
36  
37  
38  
39  
40  
41  
42  
43  
44  
45  
46  
47  
48  
49  
50  
51  
52  
53  
54  
55  
56  
57  
58  
59  
60

Conclusions: The results highlight the need to routinely screen for Primary Sleep Disorders in clinical practice and tailor sleep interventions, based on phenotype, to patients presenting with CFS. The results are discussed in terms of matching patients' self-reported sleep to these phenotypes in clinical practice.

For peer review only

## Article Focus

- Despite 85-90% of patients with CFS reporting unrefreshing sleep, previous research has been unable to reliably identify specific irregularities in objective sleep
- To explore the possibility that sleep problems in this population are not homogeneous and that several sleep-specific phenotypes exist in this population which are amenable to different treatment approaches

## Key Messages

- Over 30% of individuals with CFS, met diagnostic criteria for Sleep Apnoea or Periodic Limb Movement Disorder that could explain their current diagnosis.
- The sleep in those with CFS, without Sleep Apnoea or Periodic Limb Movement Disorder, centred around four specific sleep-disturbed phenotypes with 89.1% demonstrating quantitative criteria for insomnia or hypersomnolence.
- Each sleep-phenotype in CFS comprised objective characteristics that could be assessed and differentiated using patient's self-reports in primary care.

## Strengths and Limitations:

- This is the first study to suggest, and identify, specific sleep-phenotypes in a large sample of patients with CFS.
- The objective findings can be easily translated and applied in routine primary care.
- A limitation is the use of a single-night of Polysomnography.

## INTRODUCTION

Chronic Fatigue Syndrome (CFS), as defined by the international consensus definition<sup>1</sup> is a condition characterised by profound fatigue, of definite onset, which has persisted for at least 6 months, and causes substantial disruption to the individual's daily functioning. In addition to fatigue, at least four other key symptoms are required to fulfil diagnostic criteria, including muscle and joint pain, headache, cognitive dysfunction and unrefreshing sleep. Thus defined, CFS affects between 0.23-2.6% of the adult population<sup>2-4</sup>. There are several theories as to the pathogenesis of CFS. However it is likely the development and maintenance of CFS is multifactorial. Predisposing factors include a general propensity to both emotional and physical distress, history of abuse, being more than usually physically active, and being perfectionist<sup>5-8</sup>. Precipitating events include viruses such as glandular fever and major life events<sup>9-10</sup>. Several factors appear to be involved in the maintenance of symptoms. Physiologically evidence suggests dysregulation of the hypothalamic pituitary adrenal (HPA) axis, increased cytokine production and HPA responsiveness to cytokines<sup>11-12</sup>, and autonomic dysfunction<sup>13-14</sup>. Two studies also highlight the importance of illness beliefs and behaviours<sup>15-16</sup>. Individuals who adopt all or nothing coping styles in response to symptoms (i.e. push on through until they crash out) and attribute broad ranges of everyday symptoms to their illness are more likely to develop CFS post-virally. In sum, research suggests in CFS multiple processes in distinct domains, such as physiology, illness beliefs, inconsistent activity, sleep disturbance, medical uncertainty, and lack of guidance, can interact to maintain or exacerbate symptoms<sup>17</sup>.

As mentioned above, unrefreshing sleep is one key diagnostic characteristic of CFS<sup>1</sup>. It is also one of the most common symptom complaints<sup>18-19</sup> with 87-95% of patients reporting sleep difficulties<sup>20</sup> that do not improve over the course of the illness<sup>21</sup>. Where the purpose of sleep is subject to intense debate, its importance to human health and well-being is undeniable. Examinations of individuals deprived or restricted of sleep consistently demonstrate deteriorations in mood, cognition, and

1  
2  
3 performance<sup>22</sup>. The purpose of each different sleep stage is also unclear although it is generally  
4 agreed that the lighter stages of sleep (stage 1 sleep and stage 2 sleep) afford transitions between  
5 wakefulness and sleep and then between slow wave sleep (SWS) and Rapid Eye Movement sleep  
6 (REM). SWS and REM are believed to confer recuperative, restorative, and learning properties for  
7 the individual (e.g. the secretion of growth hormone, consolidation of memory)<sup>23-24</sup>. Therefore, the  
8 proportion of each sleep stage and timing of entry into each sleep stage, SWS and REM in particular,  
9 are important for the long-term maintenance of human physical and mental health.  
10  
11  
12  
13  
14  
15  
16  
17  
18  
19

20 Symptoms such as unrefreshing sleep may not only be markers of CFS but may also serve to  
21 maintain it. For instance there may be reciprocal links between sleep quality, sleep-wake regulation  
22 and fatigue. There is evidence of this, for instance, studies have shown that adopting activity and  
23 sleep management strategies improves HPA axis functioning as measured by cortisol levels<sup>25</sup>. This  
24 suggests further investigation of sleep disturbance of CFS is of more than academic importance but  
25 may highlight new avenues for intervention. From a clinical perspective it is also important to study  
26 sleep more thoroughly in CFS as it may highlight some areas of diagnostic ambiguity. For instance  
27 previous studies have shown sleep disorders (notably obstructive sleep apnoea) are occasionally  
28 identified during PSG assessments with CFS patient cohorts<sup>26-29</sup>.  
29  
30  
31  
32  
33  
34  
35  
36  
37  
38  
39  
40

41 Although over 30 Polysomnographic (PSG) studies on individuals with CFS exist, conclusive  
42 statements about the type of sleep abnormalities in this population are difficult. Few studies report  
43 a full characterisation of both sleep continuity (the timing, efficiency, and amount of sleep obtained)  
44 and sleep architecture (amount of each sleep or wake stage and the timing of transitions to each  
45 sleep stage), with some studies providing no PSG data at all<sup>26, 30-34</sup>. Moreover, reporting practices  
46 differ widely making interpretation and comparisons difficult (e.g. studies report the percentage of  
47 each sleep and wake stage as an index of Sleep Period Time, Total Sleep Time or even Time in Bed<sup>28-</sup>  
48  
49  
50  
51  
52  
53  
54  
55  
56  
57  
58  
59  
60

1  
2  
3 29; 35-42 whilst others report minutes of each stage<sup>43-47</sup>. What can be concluded from previous PSG  
4  
5 studies is in each study deviations from 'normal sleep' exist but there is no consistent pattern. For  
6  
7 example, where two studies<sup>43-44</sup> report poor sleep efficiencies and 'normal range' REM latencies,  
8  
9 others<sup>35-36,44</sup> found 'normal range' sleep efficiencies and short REM latencies and others still report a  
10  
11 normal sleep efficiency and a long REM latency<sup>40</sup> or poor sleep efficiency and long REM latencies<sup>47</sup>.  
12  
13 Moreover, the picture remains unclear after controlling for the severity of patients' self-reported  
14  
15 sleep complaints<sup>48-49</sup>. Although differences in protocol, definitional criteria, and reporting criteria  
16  
17 may, to some extent, explain these differences, an alternative explanation is sleep difficulties in  
18  
19 individuals with CFS are not homogenous and various sleep phenotypes exist in this population.  
20  
21  
22  
23  
24  
25

26 To clarify the specific characterisation of sleep in CFS, the current study examined polysomnographic  
27  
28 data for a single night of sleep in a large group of CFS patients, to determine whether specific sleep  
29  
30 disturbances exist in this group, and if so, are these consistent across all patients.  
31  
32  
33  
34  
35

## 36 METHOD

37  
38  
39 A cross-sectional, single-site, observational study was undertaken on a consecutive series of 343  
40  
41 patients (Mean age 37.21±12.42 years; 72 males 271 females) referred for a single-night  
42  
43 polysomnographic (PSG) study at a fatigue clinic in the Netherlands. The referral criteria for PSG  
44  
45 investigation were that the patient, a) met diagnostic criteria for CFS according the Fukuda definition  
46  
47 (1), b) they were drug-free for at least two-weeks prior to the overnight study, and c) their  
48  
49 symptoms could not be explained by a physical or psychological illness (e.g. anxiety or depression).  
50  
51 Patients gave informed consent to take part in the study and then were interviewed and medically  
52  
53 screened for the referral criteria by a registered physician and a registered psychiatrist.  
54  
55  
56  
57  
58  
59  
60



Patients arrived at the clinic two hours before normal bedtime for electrode placement and bio-calibration. The PSG montage comprised a standard 10/20 (i.e. F<sub>4</sub>-M<sub>1</sub>, C<sub>4</sub>-M<sub>1</sub>, O<sub>2</sub>-M<sub>1</sub> and C<sub>z</sub> with backups at F<sub>3</sub>-M<sub>2</sub>, C<sub>3</sub>-M<sub>2</sub>, O<sub>1</sub>-M<sub>2</sub> and F<sub>p2</sub>). Additional channels were used for EOG (E<sub>1</sub> and E<sub>2</sub> referenced to M<sub>2</sub>), EMG (chin and anterior tibialis placements), ECG, and airflow, effort, body position, and oximetry (via pulse oximeter). Filter settings were set to American Academy of Sleep Medicine<sup>50</sup> guidelines (e.g. low 0.3Hz / high 35Hz for EEG and EOG) with a sampling rate of 500Hz. Impedances were maintained below 5KΩ. Participants were allowed to retire to bed when they wished and left to naturally wake in the morning. Scoring was conducted manually by a registered BRPT certified technician at 30-second epochs, according to AASM guidelines. The scorer was blind to the aims of the study. The mean recording period was just over 8 hours (508.5 ± 63.11 minutes). Descriptions of all sleep variables are detailed in Table 1.

Table 1: Description of sleep variables

|                                  |                                                                                        |
|----------------------------------|----------------------------------------------------------------------------------------|
| Total Sleep Time (minutes)       | Amount of time asleep                                                                  |
| Sleep Onset Latency (minutes)    | Length of time from lights out to first episode of stage 2 sleep                       |
| Wake After Sleep Onset (minutes) | Number of minutes of recorded wake following first episode of stage 2 sleep            |
| Number of Awakenings (over TSP)  | Number of wake bouts following first episode of stage 2 sleep                          |
| Number of Arousals               | Number of arousals over the entire sleep period                                        |
| Sleep Efficiency                 | Percentage of overall time spent in bed asleep                                         |
| REM Latency                      | Length of time to first REM stage                                                      |
| AHI Index                        | Number of apnoea or hypopnea events per hour of sleep                                  |
| % N1 (of TST)                    | Percentage of recorded stage 1 sleep over the total time asleep                        |
| % N2 (of TST)                    | Percentage of recorded stage 2 sleep over the total time asleep                        |
| % N3 (of TST)                    | Percentage of recorded slow wave sleep over the total time asleep                      |
| % REM (of TST)                   | Percentage of recorded Rapid Eye Movement sleep over the total time asleep             |
| % WAKE (of TSP)                  | Percentage of recorded wake over the whole sleep period (from lights out to lights on) |

## RESULTS

An initial examination of the Apnoea Hypopnoea Index (AHI) and Periodic Limb Movements (PLM's) indices indicated that 104 (43 males and 61 females) of the original 343 referrals (30.3%) met AASM

1  
2  
3 criteria for either sleep apnoea (AHI  $\geq$  15; n = 101) or a periodic limb movement disorder (PLMs  $\geq$  5;  
4  
5 n =17) (14 participants met criteria for both disorders). The overall sleep profile of the remaining 239  
6  
7 patients (Mean Age 34.4 $\pm$ 11.84; 210 females and 29 males) was highly variable indicating the  
8  
9 presence of phenotypes (Figure 1).  
10

11  
12  
13  
14  
15  
16  
17  
18  
19  
20  
21  
22  
23  
24  
25  
26  
27  
28  
29  
30  
31  
32  
33  
34  
35  
36  
37  
38  
39  
40  
41  
42  
43  
44  
45  
46  
47  
48  
49  
50  
51  
52  
53  
54  
55  
56  
57  
58  
59  
60  
Insert Figure 1 Here

A hierarchical cluster analysis, using Ward's method, was undertaken to determine the number of groups (clusters) within the remaining 239 patients. Prior to the cluster analysis a correlation matrix was examined to avoid multicollinearity influencing the cluster model. On this basis four variables were excluded (Height, Weight, Sleep Efficiency, and number of Spontaneous Arousals per hour) for having correlation coefficients with one or more variables above  $r = .8$ . The final grouping variables included in the cluster analysis were; age, sex, BMI, AHI's, PLM index, Number of Awakenings, Number of Arousals per hour, Total Sleep Time (TST), Sleep Latency (SL), Wake After Sleep Onset (WASO), percentage of %N1 (stage 1 sleep) of TST, %N2 (stage 2 sleep) of TST, %N3 (SWS) of TST, %WAKE of TST, %REM of TST, and REM Latency (REML). The Euclidean squared distance measure of similarity was used to group patients according to the included variables.

There were 6 clustering iterations overall (going from 8 clusters to 2). The fourth iteration was chosen as saturation point as it was where the agglomeration schedule and dendrogram had the highest reduction in the number of groupings (from six groups to four groups = reduction of 33%) whilst retaining at least 5% of the total sample size in each group (i.e.  $n \geq 11$ ). This latter rule was chosen to afford sufficient power for inferential data analysis to occur.

A one-way ANOVA was undertaken on the four groups to determine which sleep variables significantly differentiated the groups. There were no overall differences between the groups on age ( $F(3,235)=1.95, p=.12$ ) or BMI ( $F(3,235)=.82, p=.48$ ) but a significant sex difference was observed ( $\chi^2(3)=10.54, p<.02$ ). On inspection of the sex frequencies in each group, there was a significantly higher ratio of males to females (35.71% male) in the first group compared to the other three groups (17.65%, 9.59%, and 4.17% male respectively) although due to the number of males in the overall sample (12.13%) this is likely to be artefact. In relation to the polysomnography variables there were no group differences in the number of arousals per hour or AHI index scores (PLMs were not included as less than 10% of the total sample had a PLM index), but significant differences were observed on all the other sleep variables (Table 2).

Table 2: Characteristics of sample of individuals with CFS

| Grouped Variable Clusters        | Group 1 (N = 14)  | Group 2 (N = 55) | Group 3 (N = 146) | Group 4 (N = 24) | F     | p      |
|----------------------------------|-------------------|------------------|-------------------|------------------|-------|--------|
| <b>Demographics</b>              |                   |                  |                   |                  |       |        |
| Age                              | 35.79 (12.39)     | 37.29 (12.72)    | 32.99 (10.82)     | 35.54 (14.49)    | 1.95  | n.s.   |
| BMI                              | 24.86 (5.68)      | 23.85 (4.63)     | 23.41 (4.03)      | 22.81 (3.86)     | 0.82  | n.s.   |
| <b>Sleep Variables</b>           |                   |                  |                   |                  |       |        |
| Total Sleep Time (minutes)       | 270.95 (41.85)ab  | 387.03 (46.1)acd | 473.21 (45.82)bce | 264.15 (74.43)de | 188.1 | p<.001 |
| Sleep Onset Latency (minutes)    | 107.79 (42.09)abc | 30.97 (29.13)ad  | 19.17 (14.71)bd   | 28.94 (27.54)c   | 67.26 | p<.001 |
| Wake After Sleep Onset (minutes) | 75.79 (39.35)ab   | 82.12 (45.25)cd  | 35.45 (25.39)ace  | 180.2 (58.48)bde | 119.7 | p<.001 |
| Number of Awakenings (over TSP)  | 15.21 (8.06)      | 14.75 (11.62)ab  | 9.54 (5.85)a      | 16.96 (9.26)b    | 10.52 | p<.001 |
| Number of Arousals               | 3.57 (9.21)       | 10.91 (23.01)    | 6.2 (15.26)       | 1.38 (4.13)      | 2.24  | n.s.   |
| REM Latency                      | 173.22 (55.03)abc | 57.71 (34.31)ad  | 47.01 (28.22)be   | 84.46 (48.21)cde | 63    | p<.001 |
| AHI Index                        | 3.43 (3.46)       | 4.58 (4.39)      | 4.73 (4.04)       | 3.54 (4.19)      | 0.92  | n.s.   |
| % N1 (of TST)                    | 21.84 (13.36)a    | 14.35 (9.14)b    | 12.55 (7.37)ac    | 24.22 (14.82)bc  | 14.15 | p<.001 |
| % N2 (of TST)                    | 27.57 (13.15)ab   | 38.82 (12.36)a   | 38.44 (12.14)b    | 36.95 (13.66)    | 3.46  | p<.02  |
| % N3 (of TST)                    | 44.46 (20.45)abc  | 31.07 (11.05)a   | 31.78 (12.41)b    | 29.28 (16.42)c   | 4.64  | p<.004 |
| % REM (of TST)                   | 6.11 (4.58)abc    | 15.16 (5.47)ad   | 17.19 (5.57)be    | 9.65 (6.35)cde   | 26.46 | p<.001 |
| % WAKE (of TSP)                  | 60.32 (21.09)abc  | 25.75 (11.61)ade | 11.03 (6.16)bfd   | 75.26 (22.92)cef | 271.6 | p<.001 |

### *First Phenotype*

The first phenotype comprised 14 patients with the longest Sleep Onset and REM Latencies and the highest percentage of SWS. Moreover, this group had the lowest percentages of both Stage 2 sleep and REM sleep. Statistically; this phenotype differed from the other three groups in terms of longer Sleep Onset and REM latencies, and a lower percentage of REM.

### *Second Phenotype*

The second phenotype comprised 55 patients with the highest percentage of Stage 2 sleep and the highest number of arousals per hour although neither of these variables statistically separated them from all three other phenotypes.

### *Third Phenotype*

The third phenotype comprised 146 patients with the highest Total Sleep Time and percentage of REM. Additionally, this group demonstrated the shortest Sleep Onset and REM Latencies, lowest wake after sleep onset and percentages of wake time and Stage 1 sleep, and the lowest number of awakenings. Statistically, Total Sleep Time, percentage wake, and wake after sleep onset differentiated this phenotype from each of the others.

### *Fourth Phenotype*

The fourth phenotype comprised 24 patients who demonstrated the highest wake after sleep onset, percentages of wake and Stage 1 sleep, and the highest number of awakenings. This group were also the lowest in terms of Total Sleep Time, number of arousals per hour, and percentage of SWS. Statistically, only wake after sleep onset and percentage of wake differentiated this group from each of the others.

## DISCUSSION

The aim of the study was to determine whether specific sleep phenotypes existed in patients with CFS. A large consecutive series of patients, meeting criteria for CFS, underwent a single night of polysomnography to determine the presence or absence of distinct sleep phenotypes. The first finding, over 30% of individuals meeting diagnostic criteria for CFS also demonstrated a Primary Sleep Disorder (sleep apnoea or PLMD) is important and underscores the need to assess for Primary Sleep Disorders (PSDs) in CFS populations. As recommended treatment strategies for some PSDs differ considerably from those for CFS (e.g. Continuous Positive Airway Pressure for apnoea vs. sleep management strategies in CFS) it is important to direct the individual to, or adjunct, appropriate care pathways as soon as possible. This finding also questions the ability to differentiate fatigue associated with sleep apnoea or PLMD from that associated with CFS. Here family members and/or carers may be helpful for diagnosis sensitivity as they are likely to be aware of nocturnal breathing disturbances (i.e. heavy snoring, gasping or pauses in breathing).

The overall PSG results (after excluding sleep apnoea and PLMD) confirm objective sleep difficulties in patients with CFS. When comparing percentages of each sleep stage in 'normal' adult sleepers (i.e.  $\leq 5\%$  wake, between 2-5% stage 1, between 45-55% stage 2, between 13-23% SWS, and between 20-25% REM<sup>51</sup>) to the present sample this group fall outside the range on all these variables. The present sample are spending more time awake and in the lighter stages of sleep (stage 1 and 2 sleep), and less time in deeper sleep stages of sleep (i.e. stage 2 sleep and SWS) and in REM. Further, using the quantitative benchmarks of sleep disturbance outlined by Edinger<sup>52</sup> it can be seen that where sleep efficiency and sleep latencies appear to be on the cusp of 'normal' sleep in the present sample (85% sleep efficiency is considered normal and a sleep latency of  $\geq 30$  denotes a sleep problem), wake after sleep onset appears to be almost twice as long as is considered problematic

1  
2  
3 ( $\geq 30$  minutes tends to denote a sleep problem). Together, these findings indicate that sleep is an  
4  
5 objectively verifiable problem for patients with CFS that should be addressed clinically.  
6  
7  
8  
9

10  
11 The cluster analysis identified, at saturation, four sleep phenotypes. The dendrogram identified two  
12  
13 groups partially related (i.e. groups one and four) and two that were largely independent (i.e. groups  
14  
15 two and three). This configuration was confirmed by the ANOVA showing statistically significant  
16  
17 differences in sleep continuity and architecture variables between the groups. That said, where  
18  
19 statistical significance and relative characterisation (e.g. highest in variable WX and Y and lowest in  
20  
21 variable Z) are important in understanding between-group differences the more salient question is  
22  
23 whether these four groups are clinically relevant in terms of specific sleep treatments in patients  
24  
25 with CFS. The use of different pharmacological agents (benzodiazepines, z-hypnotics, or stimulants)  
26  
27 or therapeutic interventions (i.e. Cognitive Behavioural Therapy for Insomnia or behavioural  
28  
29 modification strategies) has been shown to have differential effects on specific aspects of sleep  
30  
31 continuity and architecture. For example, zolpidem appears to have a better impact on the number  
32  
33 of awakenings and perceived quality of sleep compared to nitrazepam, and lormetazepam appears  
34  
35 better in reducing sleep latencies than zopiclone<sup>53</sup>. As such tailoring treatment options to the  
36  
37 presenting sleep problems in this population is likely to be more effective (Table 3).  
38  
39  
40  
41  
42  
43  
44  
45  
46  
47  
48  
49  
50  
51  
52  
53  
54  
55  
56  
57  
58  
59  
60

Table 3: Characteristics (statistical and phenomenological) of patients with CFS

| Sleep Phenotype | Central Differential Features                                                                                      | Associated Diagnostic Features                                                                                                            | How this may present subjectively                                                                                                                                         |
|-----------------|--------------------------------------------------------------------------------------------------------------------|-------------------------------------------------------------------------------------------------------------------------------------------|---------------------------------------------------------------------------------------------------------------------------------------------------------------------------|
| 1               | Long Sleep Onset Latency<br>Long REM Latency<br>High amounts of Slow Wave Sleep<br>Low amounts of REM              | Low amounts of Stage 2 Sleep                                                                                                              | Problems in getting off to sleep but when asleep few awakenings. The Sleep that is obtained is of normal quality.                                                         |
| 2               |                                                                                                                    | High number of arousals per hour<br>High amounts of Stage 2 Sleep                                                                         | No difficulties in getting off to sleep and few awakenings but feelings or evidence of a 'restless' nights sleep                                                          |
| 3               | High Total Sleep Time<br>Low amounts of time awake during the night<br>Low number of wake periods during the night | High amounts of REM Sleep<br>Short Sleep Onset Latency<br>Low number of Awakenings<br>Short REM Latencies<br>Low amounts of Stage 1 Sleep | No difficulties in getting off to sleep and few awakenings but feelings of being unrefreshed on waking despite a significant amount of time in bed asleep.                |
| 4               | Highest number of wake periods during the night<br>Highest amounts of time awake during the night                  | Low Total Sleep Time<br>Low number of arousals per hour during the night<br>Low amounts of Slow Wave Sleep                                | Short sleep duration and although no difficulties getting off to sleep lots of awakenings for significant periods of time. Also increased feelings of daytime sleepiness. |

Another, albeit related, consideration is the presence within the final sample of PSDs for which PSG is either not routinely recommended or where stand-alone it is insufficient for a definitive diagnosis<sup>50</sup>. Most relevant to the present sample are insomnia disorder and hypersomnolence disorders. Interestingly, groups one and four appear to be characterised by insomnia-like symptoms (i.e. difficulties initiating sleep or maintaining sleep) whereas groups two and three appear to share overlapping characteristics with disorders characterised by poor sleep quality (Table 2). In relation to group three there is some overlap with hypersomnolence disorders (the term hypersomnolence will replace hypersomnia under the DSM-5) as 14 patients (9.59%) slept for nine hours or longer and eight patients (5.48%) demonstrated the main polysomnographically defined symptom of narcolepsy (i.e. a REM Latency of less than 15 minutes). For group two there is no obvious overlap with a specific DSM-5-defined sleep disorder although as Stage 2 sleep has been associated with hormonal and autonomic regulation<sup>54</sup> increased amounts are likely to relate to both higher levels of autonomic

1  
2  
3 and cortical arousal inhibiting deep sleep. As such, a PSG study with adjunct sleep history interviews,  
4  
5 sleep diaries, actigraphy, and/or Multiple Sleep Latency Test or Maintenance of Wakefulness test  
6  
7 would be valuable tools in determining whether these groups share all the diagnostic features of  
8  
9 each PSD.  
10

11  
12  
13  
14  
15 The findings from the present study should be viewed with limitations in mind. There was no control  
16  
17 group to determine the extent to which the four phenotypes exist in the general population. That  
18  
19 said, with approximately 6% of the population meeting diagnostic criteria for insomnia<sup>55</sup> and 5%  
20  
21 meeting diagnostic criteria for hypersomnia<sup>56</sup> the present data do not reflect this with 213 of the 239  
22  
23 (89.1%) participants, without apnoea or PLMS, meeting at least one quantitative criteria for  
24  
25 insomnia or hypersomnia. It could also be argued that a single night of polysomnography may not be  
26  
27 enough to capture the sleep of patients with CFS due to the first-night-effect<sup>43</sup>. That said, where Le  
28  
29 Bon and colleagues demonstrated significant differences between nights one and two in a cohort of  
30  
31 individuals with CFS, these differences were not largely evident in the sleep architecture and many  
32  
33 differences in the sleep continuity variables disappeared after those with psychiatric illnesses were  
34  
35 excluded from the analysis. Interestingly, over 25% of Le Bon et al's<sup>43</sup> sample also demonstrated an  
36  
37 'inverse first-night-effect' whereby they slept better on the first night compared to the second. This  
38  
39 issue of the first-night-effect in CFS is further complicated by other studies which have shown no  
40  
41 such effect in this population<sup>29</sup>. It is likely that inconsistencies in the first-night-effect reflect typical  
42  
43 night-to-night variability<sup>57-59</sup> in addition to situation-specific factors relating to the PSG on the first  
44  
45 and second nights. What would be ideal, albeit expensive, is a PSG study over several nights (e.g. at  
46  
47 least fourteen continuous nights are suggested for insomnia<sup>60</sup>) to ensure these issues are accounted  
48  
49 for. That said, what may be more practical is to determine how information from the present study  
50  
51 can inform, in conjunction with other assessments, actual clinical practice. One suggestion is, ideally  
52  
53 after ruling out PSDs, individuals should be interviewed about their sleep (usually over the last  
54  
55  
56  
57  
58  
59  
60



1  
2  
3 month) and provide a sleep diary. This information would provide a subjective account that could be  
4  
5 matched to the four phenotypes (as in Table 3) to inform treatment.  
6  
7  
8  
9

10  
11 Overall, the results suggest a significant overlap between CFS and a variety of symptoms of sleep  
12  
13 disturbance. One night of PSG is sufficient to tease apart, and exclude, those with apnoea and  
14  
15 periodic limb movement disorders from four other distinct sleep phenotypes in patients with CFS.  
16  
17 Interestingly, these four phenotypes tend to mirror symptoms related to sleep quality and quantity  
18  
19 that are amenable to different treatment strategies. As such, clinicians tailoring sleep-based  
20  
21 interventions for patients with CFS should be mindful of these phenotypes.  
22  
23

24  
25  
26  
27 Contributions – All authors (JGE, ZMG, VD, JLN, PdR, DD) were involved in the design of the study.

28  
29 PdR and DD conducted the study and JGE and ZMG analysed the data. The first draft was written by  
30  
31 JGE, JLN, VD and ZMG and was edited by all authors. All authors approved the final version of the  
32  
33 manuscript.  
34  
35

36  
37  
38 Funding – This research was not funded  
39  
40

41  
42 Competing Interests – None  
43  
44

45  
46  
47 Provenance and peer review – Not commissioned; externally peer reviewed  
48  
49

50  
51 Data sharing statement – No additional data are available  
52  
53  
54  
55  
56  
57  
58  
59  
60

## REFERENCES

- (1) Fukuda, K., Straus, S. E., Hickie, I., et al. (1994). The chronic fatigue syndrome - a comprehensive approach to its definition and study. *Annals of Internal Medicine*, 121(12), 953-959.
- (2) Wessely, S., Chalder, T., Hirsch, S., Wallace, P., & Wright, D. (1997). The prevalence and morbidity of chronic fatigue and chronic fatigue syndrome: A prospective primary care study. *American Journal of Public Health*, 87(9), 1449-1455.
- (3) Jason L, Richman J, Rademaker A et al. (1999). A community based study of chronic fatigue syndrome. *Arch Intern Med*, 159: 2129–2137.
- (4) Reyes, M., Nisenbaum, R., Hoaglin, et al. (2003). Prevalence and incidence of chronic fatigue syndrome in Wichita, Kansas. *Archives of internal medicine* 163(13), 1530-1536.
- (5) Kato, K., Sullivan, P. F., Evengard, B., & Pedersen, N. L. (2006). Premorbid predictors of chronic fatigue. *Archives of General Psychiatry*, 63(11), 1267-1272.
- (6) Taylor R, Jason L (2001). Sexual abuse, physical abuse, chronic fatigue, and chronic fatigue syndrome: a community-based study. *J Nerv Ment Dis* 189: 709–715.
- (7) Harvey, S. B., Wadsworth, M., Wessely, S., & Hotopf, M. (2008). Etiology of chronic fatigue syndrome: testing popular hypotheses using a national birth cohort study. *Psychosomatic Medicine*, 70(4), 488-495.
- (8) Deary, V. & Chalder, T. (2010). Personality and perfectionism in chronic fatigue syndrome: a closer look. *Psychology & Health*, 25(4), 465-475.
- (9) Buchwald, D. S., Rea, T. D., Katon W. J., Russo, J. E., & Ashley, R. L. (2000). Acute infectious mononucleosis: characteristics of patients who report failure to recover. *The American Journal of Medicine*, 109 (7), 531-537.
- (10) Hatcher, S. & House, A. (2003). Life events, difficulties and dilemmas in the onset of chronic fatigue syndrome: a case-control study. *Psychological Medicine*, 33(7), 1185-1192.

- 1  
2  
3 (11) Gaab, J., Rohleder, N., Heitz, V., et al. (2005). Stress-induced changes in LPS-induced pro-  
4  
5 inflammatory cytokine production in chronic fatigue syndrome. *Psychoneuroendocrinology*,  
6  
7 30, 188–198.  
8  
9  
10 (12) Cho H. J., Hotopf, M., & Wessely, S. (2005). The placebo response in the treatment of chronic  
11  
12 fatigue syndrome: a systematic review and meta-analysis. *Psychosomatic Medicine*, 67(2),  
13  
14 301-13.  
15  
16 (13) Jones, D. E., Hollingsworth, K. G., Taylor, R., Blamire, A. M., & Newton, J. L. (2010).  
17  
18 Abnormalities in pH handling by peripheral muscle and potential regulation by the  
19  
20 autonomic nervous system in chronic fatigue syndrome. *Journal of Internal Medicine*, 267(4),  
21  
22 394-401.  
23  
24 (14) Newton, J. L., Pairman, J., Hallsworth, K., Moore, S., Plotz, T., & Trenell, M. I. (2011). Physical  
25  
26 activity intensity but not sedentary activity is reduced in chronic fatigue syndrome and is  
27  
28 associated with autonomic regulation. *International Journal of Medicine*, 104(8), 681-687.  
29  
30 (15) Candy, J. V., Meyer, A. W., Poggio, A. J., & Guidry, B. L. (2004). Time-reversal processing for an  
31  
32 acoustic communications experiment in a highly reverberant environment. *The Journal of*  
33  
34 *the Acoustical Society of America*, 115(4), 1621-1631.  
35  
36 (16) Moss-Morris R, Spence M, Hou R (2010). The pathway from glandular fever to chronic fatigue  
37  
38 syndrome: can the cognitive behavioural model provide the map? *Psychol Med*, 41(5), 1099-  
39  
40 101.  
41  
42 (17) Moss-Morris, R., Deary, V. & Castell, B. (2012). Chronic Fatigue Syndrome. Chapter 25 In:  
43  
44 Barnes, M. P., & Good, D. C. (Eds.). (2012). *Neurological Rehabilitation: Handbook of Clinical*  
45  
46 *Neurology* (Series Editors: Aminoff, Boller and Swaab) (Vol. 110). Elsevier.  
47  
48  
49 (18) Komaroff, A. L., & Buchwald, D. (1991). Symptoms and signs of chronic fatigue syndrome.  
50  
51 *Reviews of infectious diseases*, 13 Suppl 1, S8-11.  
52  
53  
54  
55  
56  
57  
58  
59  
60

- 1  
2  
3 (19) Manu, P., Lane, T. J., & Matthews, D. A. (1988). The frequency of the chronic fatigue syndrome  
4  
5 in patients with symptoms of persistent fatigue. *Annals of Internal Medicine*, 109(7), 554-  
6  
7 556.  
8  
9  
10 (20) Gotts, Z. M. Unpublished PhD Thesis  
11  
12 (21) Nisenbaum, R., Jones, J. F., Unger, E. R., Reyes, M., & Reeves, W. C. (2003). A population-based  
13  
14 study of the clinical course of chronic fatigue syndrome. *Health and Quality of Life*  
15  
16 *Outcomes*, 1, 49.  
17  
18 (22) Turner, T. H., Drummond, S., Salamat, J. S., & Brown, G. G. (2007). Effects of 42 hr of total sleep  
19  
20 deprivation on component processes of verbal working memory. *Neuropsychology*, 21(6),  
21  
22 787.  
23  
24 (23) Van Cauter, E., Leproult, R., & Plat, L. (2000). Age-related changes in slow wave sleep and REM  
25  
26 sleep and relationship with growth hormone and cortisol levels in healthy men. *JAMA: the*  
27  
28 *journal of the American Medical Association*, 284(7), 861-868.  
29  
30  
31 (24) Stickgold, R. (2005). Sleep-dependent memory consolidation. *Nature*, 437(7063), 1272-1278.  
32  
33 (25) Roberts, A. D. L., Wessely, S., Chalder, T., Papadopoulos, A., & Cleare, A. J. (2004). Salivary  
34  
35 cortisol response to awakening in chronic fatigue syndrome. *British Journal of Psychiatry*,  
36  
37 184, 136-141.  
38  
39 (26) Buchwald, D., Pascualy, R., Bombardier, C., & Kith, P. (1994). Sleep disorders in patients with  
40  
41 chronic fatigue. *Clinical infectious diseases : an official publication of the Infectious Diseases*  
42  
43 *Society of America*, 18(1), S68-72.  
44  
45 (27) Krupp, L. B., Jandorf, L., Coyle, P. K., & Mendelson, W. B. (1993). Sleep disturbance in chronic  
46  
47 fatigue syndrome. *Journal of Psychosomatic Research*, 37(4), 325-331.  
48  
49 (28) Manu, P., Lane, T. J., Matthews, D. A., Castriotta, R. J., Watson, R. K., & Abeles, M. (1994). Alpha-  
50  
51 delta sleep in patients with a chief complaint of chronic fatigue. *Southern medical journal*,  
52  
53 87(4), 465-470.  
54  
55  
56  
57  
58  
59  
60

- 1  
2  
3 (29) Whelton, C. L., Salit, I., & Moldofsky, H. (1992). Sleep, epstein-barr virus infection,  
4  
5 musculoskeletal pain, and depressive symptoms in chronic fatigue syndrome. *J Rheumatol*,  
6  
7 *19*(6), 939-943.  
8
- 9 (30) Creti, L., Libman, E., Baltzan, M., Rizzo, D., Bailes, S., & Fichten, C. S. (2010). Impaired sleep in  
10  
11 chronic fatigue syndrome how is it best measured? *Journal of Health Psychology*, *15*(4), 596-  
12  
13 607.  
14
- 15 (31) Decker, M. J., Tabassum, H., Lin, J. M. S., & Reeves, W. C. (2009). Electroencephalographic  
16  
17 correlates of chronic fatigue syndrome. *Behavioral and Brain Functions*, *5*.  
18  
19
- 20 (32) Fossey, M., Libman, E., Bailes, S., et al. (2004). Sleep quality and psychological adjustment in  
21  
22 chronic fatigue syndrome. *Journal of Behavioral Medicine*, *27*(6), 581-605.  
23  
24
- 25 (33) Kishi, A., Natelson, B. H., Togo, F., Struzik, Z. R., Rapoport, D. M., & Yamamoto, Y. (2010). Sleep  
26  
27 stage transitions in chronic fatigue syndrome patients with or without fibromyalgia. *Conf*  
28  
29 *Proc IEEE Eng Med Biol Soc*, *1*, 5391-5394.  
30
- 31 (34) Watson, N. F., Jacobsen, C., Goldberg, J., Kapur, V., & Buchwald, D. (2004). Subjective and  
32  
33 objective sleepiness in monozygotic twins discordant for chronic fatigue syndrome. *Sleep*,  
34  
35 *27*(5), 973-977.  
36
- 37 (35) Armitage, R., Landis, C., Hoffmann, R., et al. (2007). The impact of a 4-hour sleep delay on slow  
38  
39 wave activity in twins discordant for chronic fatigue syndrome. *Sleep*, *30*(5), 657-662.  
40  
41
- 42 (36) Ball, N., Buchwald, D. S., Schmidt, D., Goldberg, J., Ashton, S., & Armitage, R. (2004).  
43  
44 Monozygotic twins discordant for chronic fatigue syndrome - objective measures of sleep.  
45  
46 *Journal of Psychosomatic Research*, *56*(2), 207-212.  
47
- 48 (37) Fischler, B., LeBon, O., Hoffmann, G., Cluydts, R., Kaufman, L., & DeMeirleir, K. (1997). Sleep  
49  
50 anomalies in the chronic fatigue syndrome - a comorbidity study. *Neuropsychobiology*, *35*(3),  
51  
52 115-122.  
53  
54  
55  
56  
57  
58  
59  
60

- 1  
2  
3 (38) Majer, M., Jones, J. F., Unger, E. R., et al. (2007). Perception versus polysomnographic  
4  
5 assessment of sleep in cfs and non-fatigued control subjects: Results from a population-  
6  
7 based study. *BMC Neurology*, 7.  
8  
9 (39) Reeves, W. C., Heim, C., Maloney, E. M., et al. (2006). Sleep characteristics of persons with  
10  
11 chronic fatigue syndrome and non-fatigued controls: Results from a population-based study.  
12  
13 *BMC Neurology*, 6.  
14  
15 (40) Stores, G., Fry, A., & Crawford, C. (1998). Sleep abnormalities demonstrated by home  
16  
17 polysomnography in teenagers with chronic fatigue syndrome. *Journal of Psychosomatic*  
18  
19 *Research*, 45(1), 85-91.  
20  
21 (41) Van Hoof, E., De Becker, P., Lapp, C., Cluydts, R., & De Meirleir, K. (2007). Defining the  
22  
23 occurrence and influence of alpha-delta sleep in chronic fatigue syndrome. *American Journal*  
24  
25 *of the Medical Sciences*, 333(2), 78-84.  
26  
27 (42) Watson, N. F., Kapur, V., Arguelles, et al. (2003). Comparison of subjective and objective  
28  
29 measures of insomnia in monozygotic twins discordant for chronic fatigue syndrome. *Sleep*,  
30  
31 26(3), 324-328.  
32  
33 (43) Le Bon, O., Minner, P., Van Moorsel, C., et al. (2003). First-night effect in the chronic fatigue  
34  
35 syndrome. *Psychiatry Research*, 120(2), 191-199.  
36  
37 (44) Le Bon, O., Neu, D., Valente, F., & Linkowski, P. (2007). Paradoxical nrems distribution in "pure"  
38  
39 chronic fatigue patients: A comparison with sleep apnea-hypopnea patients and healthy  
40  
41 control subjects. *Journal of Chronic Fatigue Syndrome*, 14(2), 45-60.  
42  
43 (45) Morriss, R., Sharpe, M., Sharpley, A. L., Cowen, P. J., Hawton, K., & Morris, J. (1993).  
44  
45 Abnormalities of sleep in patients with the chronic fatigue syndrome. *British Medical*  
46  
47 *Journal*, 306(6886), 1161-1164.  
48  
49  
50  
51  
52  
53  
54  
55  
56  
57  
58  
59  
60

- 1  
2  
3 (46) Sharpley, A., Clements, A., Hawton, K., & Sharpe, M. (1997). Do patients with "pure" chronic  
4  
5 fatigue syndrome (neurasthenia) have abnormal sleep? *Psychosomatic Medicine*, 59(6), 592-  
6  
7 596.  
8
- 9 (47) Togo, F., Natelson, B. H., Cherniack, N. S., FitzGibbons, J., Garcon, C., & Rapoport, D. M. (2008).  
10  
11 Sleep structure and sleepiness in chronic fatigue syndrome with or without coexisting  
12  
13 fibromyalgia. *Arthritis Research & Therapy*, 10(3).  
14
- 15 (48) Guilleminault, C., Poyares, D., da Rosa, A., Kirisoglu, C., Almeida, T., & Lopes, M. C. (2006).  
16  
17 Chronic fatigue, unrefreshing sleep and nocturnal polysomnography. *Sleep Medicine*, 7(6),  
18  
19 513-520.  
20
- 21 (49) Rahman, K. B., A. Galbraith, S. Lloyd, A. & Vollmer-Conna, U. (2011). Sleep-wake behavior in  
22  
23 chronic fatigue syndrome. *Sleep*, 34(5), 671-678.  
24
- 25 (50) American Academy of Sleep Medicine. (2007) *The AASM manual for the scoring of sleep and*  
26  
27 *associated events : rules, terminology and technical specifications*. Washington DC. Author.  
28
- 29 (51) Carskadon, M. & Dement, W.C. (2011). Normal human sleep: An overview. Chapter 2 In Kryger,  
30  
31 M.H., Roth, T. & Dement, W.C. *Principles and Practice of Sleep Medicine* (5<sup>th</sup> Edition).  
32  
33 Elsevier: Missouri.  
34
- 35 (52) Edinger, J. D., Bonnet, M. H., Bootzin, R. R., et al. (2004). Derivation of research diagnostic  
36  
37 criteria for insomnia: report of an American Academy of Sleep Medicine Work Group. *Sleep*,  
38  
39 27(8), 1567-1596.  
40
- 41 (53) Dündar, Y., Dodd, S., Strobl, J., Boland, A., Dickson, R., & Walley, T. (2004). Comparative efficacy  
42  
43 of newer hypnotic drugs for the short-term management of insomnia: a systematic review  
44  
45 and meta-analysis. *Human Psychopharmacology: Clinical and Experimental*, 19(5), 305-322.  
46  
47
- 48 (54) Brandenberger, G., Buchheit, M., Ehrhart, J., Simon, C., & Piquard, F. (2005). Is slow wave sleep  
49  
50 an appropriate recording condition for heart rate variability analysis? *Autonomic*  
51  
52 *Neuroscience*, 121(1), 81-86.  
53  
54  
55  
56  
57  
58  
59  
60

- 1  
2  
3 (55) Dauvilliers, Y. (2006). Differential diagnosis in hypersomnia. *Current neurology and neuroscience*  
4 *reports*, 6(2), 156-162.  
5  
6  
7 (56) Ohayon, M. M. (2002). Epidemiology of insomnia: what we know and what we still need to  
8 learn. *Sleep medicine reviews*, 6(2), 97-111.  
9  
10  
11 (57) Buysse, D. J., Cheng, Y., Germain, A., et al. (2010). Night-to-night sleep variability in older adults  
12 with and without chronic insomnia. *Sleep medicine*, 11(1), 56.  
13  
14  
15 (58) Perlis, M.L., Swinkles, C.M., Gherman, P.R., Pigeon, W.R., Matteson-Rusby, S.E., Jungvist, C. R.  
16 (2009). The incidence and temporal patterning of insomnia: a pilot study. *Journal of Sleep*  
17 *Research*, 19(1), 31-35.  
18  
19  
20  
21 (59) Vallieres, A., Ivers, H., Beaulieu-Bonneau, S. & Morin, C.M. (2011). Predictability of Sleep in  
22 Patients with Insomnia. *Sleep*, 34(5), 609-617.  
23  
24  
25  
26 (60) Wohlgemuth, W.K., Edinger, J.D., Fins, A.I. & Sullivan, R.J. (1999). How many nights are enough?  
27 The short-term stability of sleep parameters in elderly insomniacs and normal sleepers.  
28 *Psychophysiology*, 36(2), 233-244.  
29  
30  
31  
32  
33  
34  
35  
36  
37  
38  
39  
40  
41  
42  
43  
44  
45  
46  
47  
48  
49  
50  
51  
52  
53  
54  
55  
56  
57  
58  
59  
60



STROBE Statement—Checklist of items that should be included in reports of *cross-sectional studies*

|                              | Item No | Recommendation                                                                                                                                                                                                                                                                                                                                                                                                |
|------------------------------|---------|---------------------------------------------------------------------------------------------------------------------------------------------------------------------------------------------------------------------------------------------------------------------------------------------------------------------------------------------------------------------------------------------------------------|
| <b>X Title and abstract</b>  | 1       | (a) Indicate the study's design with a commonly used term in the title or the abstract<br>(b) Provide in the abstract an informative and balanced summary of what was done and what was found                                                                                                                                                                                                                 |
| <b>X Introduction</b>        |         |                                                                                                                                                                                                                                                                                                                                                                                                               |
| Background/rationale         | 2       | Explain the scientific background and rationale for the investigation being reported                                                                                                                                                                                                                                                                                                                          |
| Objectives                   | 3       | State specific objectives, including any prespecified hypotheses                                                                                                                                                                                                                                                                                                                                              |
| <b>X Methods</b>             |         |                                                                                                                                                                                                                                                                                                                                                                                                               |
| Study design                 | 4       | Present key elements of study design early in the paper                                                                                                                                                                                                                                                                                                                                                       |
| Setting                      | 5       | Describe the setting, locations, and relevant dates, including periods of recruitment, exposure, follow-up, and data collection                                                                                                                                                                                                                                                                               |
| Participants                 | 6       | (a) Give the eligibility criteria, and the sources and methods of selection of participants                                                                                                                                                                                                                                                                                                                   |
| Variables                    | 7       | Clearly define all outcomes, exposures, predictors, potential confounders, and effect modifiers. Give diagnostic criteria, if applicable                                                                                                                                                                                                                                                                      |
| Data sources/<br>measurement | 8*      | For each variable of interest, give sources of data and details of methods of assessment (measurement). Describe comparability of assessment methods if there is more than one group                                                                                                                                                                                                                          |
| Bias                         | 9       | Describe any efforts to address potential sources of bias                                                                                                                                                                                                                                                                                                                                                     |
| Study size                   | 10      | Explain how the study size was arrived at                                                                                                                                                                                                                                                                                                                                                                     |
| Quantitative variables       | 11      | Explain how quantitative variables were handled in the analyses. If applicable, describe which groupings were chosen and why                                                                                                                                                                                                                                                                                  |
| Statistical methods          | 12      | (a) Describe all statistical methods, including those used to control for confounding<br>(b) Describe any methods used to examine subgroups and interactions<br>(c) Explain how missing data were addressed<br>(d) If applicable, describe analytical methods taking account of sampling strategy<br>(e) Describe any sensitivity analyses                                                                    |
| <b>X Results</b>             |         |                                                                                                                                                                                                                                                                                                                                                                                                               |
| Participants                 | 13*     | (a) Report numbers of individuals at each stage of study—eg numbers potentially eligible, examined for eligibility, confirmed eligible, included in the study, completing follow-up, and analysed<br>(b) Give reasons for non-participation at each stage<br>(c) Consider use of a flow diagram                                                                                                               |
| Descriptive data             | 14*     | (a) Give characteristics of study participants (eg demographic, clinical, social) and information on exposures and potential confounders<br>(b) Indicate number of participants with missing data for each variable of interest                                                                                                                                                                               |
| Outcome data                 | 15*     | Report numbers of outcome events or summary measures                                                                                                                                                                                                                                                                                                                                                          |
| Main results                 | 16      | (a) Give unadjusted estimates and, if applicable, confounder-adjusted estimates and their precision (eg, 95% confidence interval). Make clear which confounders were adjusted for and why they were included<br>(b) Report category boundaries when continuous variables were categorized<br>(c) If relevant, consider translating estimates of relative risk into absolute risk for a meaningful time period |
| Other analyses               | 17      | Report other analyses done—eg analyses of subgroups and interactions, and sensitivity analyses                                                                                                                                                                                                                                                                                                                |

|                            |    |                                                                                                                                                                            |
|----------------------------|----|----------------------------------------------------------------------------------------------------------------------------------------------------------------------------|
| <b>X Discussion</b>        |    |                                                                                                                                                                            |
| Key results                | 18 | Summarise key results with reference to study objectives                                                                                                                   |
| Limitations                | 19 | Discuss limitations of the study, taking into account sources of potential bias or imprecision. Discuss both direction and magnitude of any potential bias                 |
| Interpretation             | 20 | Give a cautious overall interpretation of results considering objectives, limitations, multiplicity of analyses, results from similar studies, and other relevant evidence |
| Generalisability           | 21 | Discuss the generalisability (external validity) of the study results                                                                                                      |
| <b>X Other information</b> |    |                                                                                                                                                                            |
| Funding                    | 22 | Give the source of funding and the role of the funders for the present study and, if applicable, for the original study on which the present article is based              |

\*Give information separately for exposed and unexposed groups.

**Note:** An Explanation and Elaboration article discusses each checklist item and gives methodological background and published examples of transparent reporting. The STROBE checklist is best used in conjunction with this article (freely available on the Web sites of PLoS Medicine at <http://www.plosmedicine.org/>, Annals of Internal Medicine at <http://www.annals.org/>, and Epidemiology at <http://www.epidem.com/>). Information on the STROBE Initiative is available at [www.strobe-statement.org](http://www.strobe-statement.org).

Figure 1: Study Overview

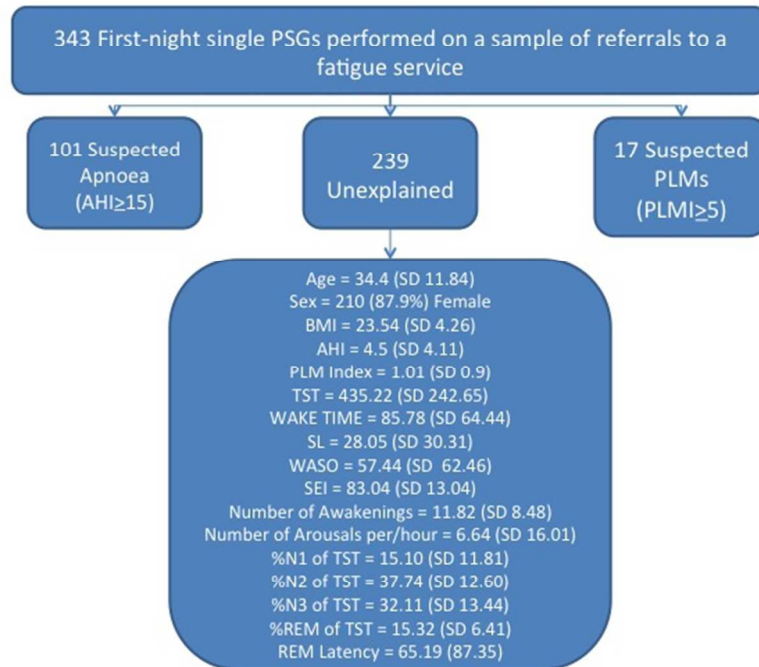

Study Overview  
254x190mm (72 x 72 DPI)

Review only



**Are there sleep-specific phenotypes in patients with Chronic Fatigue Syndrome? A cross-sectional polysomnography analysis**

|                                 |                                                                                                                                                                                                                                                                                                                                                                                                                                            |
|---------------------------------|--------------------------------------------------------------------------------------------------------------------------------------------------------------------------------------------------------------------------------------------------------------------------------------------------------------------------------------------------------------------------------------------------------------------------------------------|
| Journal:                        | <i>BMJ Open</i>                                                                                                                                                                                                                                                                                                                                                                                                                            |
| Manuscript ID:                  | bmjopen-2013-002999.R1                                                                                                                                                                                                                                                                                                                                                                                                                     |
| Article Type:                   | Research                                                                                                                                                                                                                                                                                                                                                                                                                                   |
| Date Submitted by the Author:   | 24-Apr-2013                                                                                                                                                                                                                                                                                                                                                                                                                                |
| Complete List of Authors:       | Gotts, Zoe; Northumbria University, Northumbria Centre for Sleep Research<br>Deary, Vincent; Northumbria University, Psychology<br>Newton, Julia; Newcastle University, Institute for Ageing and Health<br>van der Dussen, Donna; VermoeidheidCentrum Nederland bv, Fatigue Service<br>de Roy, Pierre; VermoeidheidCentrum Nederland bv, Fatigue Service<br>Ellis, Jason; University of Northumbria, Northumbria Centre for Sleep Research |
| <b>Primary Subject Heading</b>: | Patient-centred medicine                                                                                                                                                                                                                                                                                                                                                                                                                   |
| Secondary Subject Heading:      | Patient-centred medicine, General practice / Family practice, Evidence based practice                                                                                                                                                                                                                                                                                                                                                      |
| Keywords:                       | INTERNAL MEDICINE, SLEEP MEDICINE, STATISTICS & RESEARCH METHODS, MENTAL HEALTH                                                                                                                                                                                                                                                                                                                                                            |
|                                 |                                                                                                                                                                                                                                                                                                                                                                                                                                            |

SCHOLARONE™  
Manuscripts

1  
2  
3 Are there sleep-specific phenotypes in patients with Chronic Fatigue Syndrome? A cross-sectional  
4  
5 Polysomnography analysis  
6  
7  
8

9 Zoe M. Gotts MSc<sup>a</sup>, Vincent Deary PhD<sup>a</sup>, Julia Newton MD<sup>b</sup>, Donna van der Dussen MD<sup>c</sup>, Pierre de  
10  
11 Roy MD<sup>c</sup>, Jason G. Ellis PhD<sup>a\*</sup>  
12  
13

14  
15  
16 \* Corresponding Author

17 Dr Jason G Ellis

18 Northumbria Centre for Sleep Research

19 School of Life Sciences

20 Northumbria University

21 138 Northumberland Building

22 Newcastle-upon-Tyne

23 NE1 8ST

24 [Jason.ellis@northumbria.ac.uk](mailto:Jason.ellis@northumbria.ac.uk)

25 +44(0)1912273081  
26  
27  
28  
29  
30  
31  
32  
33  
34  
35  
36  
37

- 38 a) Northumbria Centre for Sleep Research, Northumbria University, Newcastle, UK  
39 b) Institute for Ageing and Health, Newcastle University, Newcastle, UK  
40 c) VermoeidheidCentrum Nederland bv, Lelystad, Netherlands  
41  
42  
43  
44  
45  
46  
47  
48  
49  
50  
51  
52  
53  
54  
55  
56  
57  
58  
59  
60

1  
2  
3 ABSTRACT  
4

5  
6 Objectives: Despite sleep disturbances being a central complaint in patients with Chronic Fatigue  
7  
8 Syndrome (CFS), evidence of objective sleep abnormalities, from over 30 studies, is inconsistent. The  
9  
10 present study aimed to identify whether sleep-specific phenotypes exist in CFS and explore objective  
11  
12 characteristics that could differentiate phenotypes, whilst also being relevant to routine clinical  
13  
14 practice.

15  
16  
17  
18 Design: A cross-sectional, single-site, study.

19  
20  
21 Setting: A fatigue clinic in the Netherlands

22  
23  
24 Participants: A consecutive series of 343 patients meeting criteria for CFS, according to the Fukuda  
25  
26 definition.

27  
28  
29 Measures: Patients underwent a single night of polysomnography (all-night recording of  
30  
31 Electroencephalography, Electromyography, Electrooculography, Electrocardiogram and Respiration)  
32  
33 that were hand-scored by a researcher blind to diagnosis and patient history.

34  
35  
36  
37 Results: Of the 343 patients, 104 (30.3%) were identified with a Primary Sleep Disorder explaining  
38  
39 their diagnosis. A hierarchical cluster analysis on the remaining 239 patients resulted in four sleep  
40  
41 phenotypes identified at saturation. Of the 239 patients, 89.1% met quantitative criteria for at least  
42  
43 one objective sleep problem. A one-way ANOVA confirmed distinct sleep profiles for each sleep  
44  
45 phenotype. Relatively longer sleep onset latencies, longer Rapid Eye Movement (REM) latencies, and  
46  
47 smaller percentages of both Stage 2 and REM characterized the first phenotype. The second  
48  
49 phenotype was characterised by more frequent arousals per hour. The third phenotype was  
50  
51 characterised by a longer Total Sleep Time, shorter REM Latencies, and a higher percentage of REM  
52  
53 and low percentage of wake time. The final phenotype had the shortest Total Sleep Time and the  
54  
55 highest percentage of wake time and wake after sleep onset.  
56  
57

1  
2  
3 Conclusions: The results highlight the need to routinely screen for Primary Sleep Disorders in clinical  
4  
5 practice and tailor sleep interventions, based on phenotype, to patients presenting with CFS. The  
6  
7 results are discussed in terms of matching patients' self-reported sleep to these phenotypes in  
8  
9 clinical practice.  
10  
11  
12  
13  
14  
15  
16  
17  
18  
19  
20  
21  
22  
23  
24  
25  
26  
27  
28  
29  
30  
31  
32  
33  
34  
35  
36  
37  
38  
39  
40  
41  
42  
43  
44  
45  
46  
47  
48  
49  
50  
51  
52  
53  
54  
55  
56  
57  
58  
59  
60

For peer review only

## Article Focus

- Despite 85-90% of patients with CFS reporting unrefreshing sleep, previous research has been unable to reliably identify specific irregularities in objective sleep
- To explore the possibility that sleep problems in this population are not homogeneous and that several sleep-specific phenotypes exist in this population which are amenable to different treatment approaches

## Key Messages

- Over 30% of individuals with CFS, met diagnostic criteria for Sleep Apnoea or Periodic Limb Movement Disorder that could explain their current diagnosis.
- The sleep in those with CFS, without Sleep Apnoea or Periodic Limb Movement Disorder, centred around four specific sleep-disturbed phenotypes with 89.1% demonstrating quantitative criteria for insomnia or hypersomnolence.
- Each sleep-phenotype in CFS comprised objective characteristics that could be assessed and differentiated using patient's self-reports in primary care.

## Strengths and Limitations:

- This is the first study to suggest, and identify, specific sleep-phenotypes in a large sample of patients with CFS.
- The objective findings can be easily translated and applied in routine primary care.
- A limitation is the use of a single-night of Polysomnography.



## INTRODUCTION

Chronic Fatigue Syndrome (CFS), as defined by the international consensus definition<sup>1</sup> is a condition characterised by profound fatigue, of definite onset, which has persisted for at least 6 months, and causes substantial disruption to the individual's daily functioning. In addition to fatigue, at least four other key symptoms are required to fulfil diagnostic criteria, including muscle and joint pain, headache, cognitive dysfunction and unrefreshing sleep. Thus defined, CFS affects between 0.23-2.6% of the adult population<sup>2-4</sup>. There are several theories as to the pathogenesis of CFS. However it is likely the development and maintenance of CFS is multifactorial. Predisposing factors include a general propensity to both emotional and physical distress, history of abuse, being more than usually physically active, and being perfectionist<sup>5-8</sup>. Precipitating events include viruses such as glandular fever and major life events<sup>9-10</sup>. Several factors appear to be involved in the maintenance of symptoms. Physiologically, evidence suggests dysregulation of the hypothalamic pituitary adrenal (HPA) axis, increased cytokine production and HPA responsiveness to cytokines<sup>11-12</sup>, hypersensitivity in the Central Nervous System (i.e. central sensitisation)<sup>13-14</sup>, and autonomic dysfunction<sup>15-16</sup>. Two studies also highlight the importance of illness beliefs and behaviours<sup>17-18</sup>. Individuals who adopt all or nothing coping styles in response to symptoms (i.e. push on through until they crash out) and attribute broad ranges of everyday symptoms to their illness are more likely to develop CFS post-virally. In sum, research suggests in CFS multiple processes in distinct domains, such as physiology, illness beliefs, inconsistent activity, sleep disturbance, medical uncertainty, and lack of guidance, can interact to maintain or exacerbate symptoms<sup>19</sup>.

As mentioned above, unrefreshing sleep is one key diagnostic characteristic of CFS<sup>1</sup>. It is also one of the most common symptom complaints<sup>20-21</sup> with 87-95% of patients reporting sleep difficulties<sup>22</sup> that do not improve over the course of the illness<sup>23</sup>. Where the purpose of sleep is subject to intense debate, its importance to human health and well-being is undeniable. Examinations of individuals

1  
2  
3 deprived or restricted of sleep consistently demonstrate deteriorations in mood, cognition, and  
4 performance<sup>24</sup>. The purpose of each different sleep stage is also unclear although it is generally  
5 agreed that the lighter stages of sleep (stage 1 sleep and stage 2 sleep) afford transitions between  
6 wakefulness and sleep and then between slow wave sleep (SWS) and Rapid Eye Movement sleep  
7 (REM). SWS and REM are believed to confer recuperative, restorative, and learning properties for  
8 the individual (e.g. the secretion of growth hormone, consolidation of memory)<sup>25-26</sup>. Therefore, the  
9 proportion of each sleep stage and timing of entry into each sleep stage, SWS and REM in particular,  
10 are important for the long-term maintenance of human physical and mental health.  
11  
12  
13  
14  
15  
16  
17  
18  
19  
20  
21

22 Symptoms such as unrefreshing sleep may not only be markers of CFS but may also serve to  
23 maintain it. For instance there may be reciprocal links between sleep quality, sleep-wake regulation  
24 and fatigue. There is evidence of this, for instance, studies have shown that adopting activity and  
25 sleep management strategies improves HPA axis functioning as measured by cortisol levels<sup>27</sup>. This  
26 suggests further investigation of sleep disturbance of CFS is of more than academic importance but  
27 may highlight new avenues for intervention. From a clinical perspective it is also important to study  
28 sleep more thoroughly in CFS as it may highlight some areas of diagnostic ambiguity. For instance  
29 previous studies have shown sleep disorders (notably obstructive sleep apnoea) are occasionally  
30 identified during PSG assessments with CFS patient cohorts<sup>28-31</sup>.  
31  
32  
33  
34  
35  
36  
37  
38  
39  
40  
41  
42  
43

44 Although over 30 Polysomnographic (PSG) studies on individuals with CFS exist, conclusive  
45 statements about the type of sleep abnormalities in this population are difficult. Few studies report  
46 a full characterisation of both sleep continuity (the timing, efficiency, and amount of sleep obtained)  
47 and sleep architecture (amount of each sleep or wake stage and the timing of transitions to each  
48 sleep stage), with some studies providing no PSG data at all<sup>28, 32-36</sup>. Moreover, reporting practices  
49 differ widely making interpretation and comparisons difficult (e.g. studies report the percentage of  
50  
51  
52  
53  
54  
55  
56  
57  
58  
59  
60

1  
2  
3 each sleep and wake stage as an index of Sleep Period Time, Total Sleep Time or even Time in Bed<sup>30-</sup>  
4  
5 <sup>31; 37-44</sup> whilst others report minutes of each stage<sup>45-49</sup>. What can be concluded from previous PSG  
6  
7 studies is in each study deviations from 'normal sleep' exist but there is no consistent pattern. For  
8  
9 example, where two studies<sup>45-46</sup> report poor sleep efficiencies and 'normal range' REM latencies,  
10  
11 others<sup>37-38,46</sup> found 'normal range' sleep efficiencies and short REM latencies and others still report a  
12  
13 normal sleep efficiency and a long REM latency<sup>42</sup> or poor sleep efficiency and long REM latencies<sup>49</sup>.  
14  
15 Moreover, the picture remains unclear after controlling for the severity of patients' self-reported  
16  
17 sleep complaints<sup>50-51</sup>. Although differences in protocol, definitional criteria, and reporting criteria  
18  
19 may, to some extent, explain these differences, an alternative explanation is sleep difficulties in  
20  
21 individuals with CFS are not homogenous and various sleep phenotypes exist in this population.  
22  
23  
24  
25  
26  
27

28 To clarify the specific characterisation of sleep in CFS, the current study examined polysomnographic  
29  
30 data for a single night of sleep in a large group of CFS patients, to determine whether specific sleep  
31  
32 disturbances exist in this group, and if so, are these consistent across all patients.  
33  
34  
35  
36  
37

## 38 METHOD

39  
40  
41 A cross-sectional, single-site, observational study was undertaken on a consecutive series of 343  
42  
43 patients (Mean age 37.21±12.42 years; 72 males 271 females) referred for a single-night  
44  
45 polysomnographic (PSG) study at a fatigue clinic in the Netherlands. The referral criteria for PSG  
46  
47 investigation were that the patient, a) met diagnostic criteria for CFS according the Fukuda definition  
48  
49 (1), b) they were drug-free for at least two-weeks prior to the overnight study, and c) their  
50  
51 symptoms could not be explained by a physical or psychological illness (e.g. anxiety or depression).  
52  
53  
54 Patients gave informed consent to take part in the study and then were interviewed and medically  
55  
56  
57  
58  
59  
60

1  
2  
3 screened for the referral criteria by a registered physician and a registered psychiatrist. The Ethics  
4  
5 Committee for the School of Life Sciences at Northumbria University had approved the study.  
6  
7  
8  
9

10  
11 Patients arrived at the clinic two hours before normal bedtime for electrode placement and bio-  
12  
13 calibration. The PSG montage comprised a standard 10/20 (i.e. F<sub>4</sub>-M<sub>1</sub>, C<sub>4</sub>-M<sub>1</sub>, O<sub>2</sub>-M<sub>1</sub> and C<sub>z</sub> with  
14  
15 backups at F<sub>3</sub>-M<sub>2</sub>, C<sub>3</sub>-M<sub>2</sub>, O<sub>1</sub>-M<sub>2</sub> and F<sub>p2</sub>). Additional channels were used for EOG (E<sub>1</sub> and E<sub>2</sub>  
16  
17 referenced to M<sub>2</sub>), EMG (chin and anterior tibialis placements), ECG, and airflow, effort, body  
18  
19 position, and oximetry (via pulse oximeter). Filter settings were set to American Academy of Sleep  
20  
21 Medicine<sup>52</sup> guidelines (e.g. low 0.3Hz / high 35Hz for EEG and EOG) with a sampling rate of 500Hz.  
22  
23 Impedances were maintained below 5KΩ. Participants slept in the laboratory overnight and were  
24  
25 allowed to retire to bed when they wished and left to naturally wake in the morning. Scoring was  
26  
27 conducted manually by a registered BRPT certified technician at 30-second epochs, according to  
28  
29 AASM guidelines. The scorer was blind to the aims of the study. The mean recording period was just  
30  
31 over 8 hours (508.5 ± 63.11 minutes). Descriptions of all sleep variables are detailed in Table 1.  
32  
33  
34  
35  
36  
37  
38

39 Table 1: Description of sleep variables

|                                  |                                                                                        |
|----------------------------------|----------------------------------------------------------------------------------------|
| Total Sleep Time (minutes)       | Amount of time asleep                                                                  |
| Sleep Onset Latency (minutes)    | Length of time from lights out to first episode of stage 2 sleep                       |
| Wake After Sleep Onset (minutes) | Number of minutes of recorded wake following first episode of stage 2 sleep            |
| Number of Awakenings (over TSP)  | Number of wake bouts following first episode of stage 2 sleep                          |
| Number of Arousals               | Number of arousals over the entire sleep period                                        |
| Sleep Efficiency                 | Percentage of overall time spent in bed asleep                                         |
| REM Latency                      | Length of time to first REM stage                                                      |
| AHI Index                        | Number of apnoea or hypopnea events per hour of sleep                                  |
| % N1 (of TST)                    | Percentage of recorded stage 1 sleep over the total time asleep                        |
| % N2 (of TST)                    | Percentage of recorded stage 2 sleep over the total time asleep                        |
| % N3 (of TST)                    | Percentage of recorded slow wave sleep over the total time asleep                      |
| % REM (of TST)                   | Percentage of recorded Rapid Eye Movement sleep over the total time asleep             |
| % WAKE (of TSP)                  | Percentage of recorded wake over the whole sleep period (from lights out to lights on) |

40  
41  
42  
43  
44  
45  
46  
47  
48  
49  
50  
51  
52  
53  
54  
55  
56  
57 Analytic Strategy

1  
2  
3 A hierarchical Cluster Analysis was used to determine the number of phenotypes within the present  
4  
5 sample after excluding those with Sleep Apnoea or Periodic Limb Movement Disorder. Cluster  
6  
7 analysis is a data reduction technique that examines patterns amongst a set of variables to form  
8  
9 homogenous groups. The Euclidean squared distance measure of similarity method was chosen for  
10  
11 the cluster analysis as it uses the progressive distance between variables to form the groups and  
12  
13 does not rely upon standardised data. As cluster analysis can be affected by multicollinearity, a  
14  
15 correlation matrix was used to exclude variables that were highly correlated with one another. A  
16  
17 One-Way Analysis Of Variance (ANOVA) was used to examine which of the sleep variables  
18  
19 differentiated the phenotypes.  
20  
21  
22  
23  
24  
25

## 26 RESULTS

27  
28  
29 An initial examination of the Apnoea Hypopnoea Index (AHI) and Periodic Limb Movements (PLM's)  
30  
31 indices indicated that 104 (43 males and 61 females) of the original 343 referrals (30.3%) met AASM  
32  
33 criteria for either sleep apnoea (AHI  $\geq 15$ ; n = 101) or a periodic limb movement disorder (PLMs  $\geq 5$ ;  
34  
35 n =17) (14 participants met criteria for both disorders). The overall sleep profile of the remaining 239  
36  
37 patients (Mean Age 34.4 $\pm$ 11.84; 210 females and 29 males) was highly variable indicating the  
38  
39 presence of phenotypes (Figure 1).  
40  
41  
42  
43  
44  
45

46 Insert Figure 1 Here  
47  
48  
49  
50  
51

52 A hierarchical cluster analysis, using Ward's method, was undertaken to determine the number of  
53  
54 groups (clusters) within the remaining 239 patients. Prior to the cluster analysis a correlation matrix  
55  
56 was examined to avoid multicollinearity influencing the cluster model. On this basis four variables  
57  
58  
59  
60

1  
2  
3 were excluded (Height, Weight, Sleep Efficiency, and number of Spontaneous Arousals per hour) for  
4  
5 having correlation coefficients with one or more variables above  $r = .8$ . The final grouping variables  
6  
7 included in the cluster analysis were; age, sex, BMI, AHI's, PLM index, Number of Awakenings,  
8  
9 Number of Arousals per hour, Total Sleep Time (TST), Sleep Latency (SL), Wake After Sleep Onset  
10  
11 (WASO), percentage of %N1 (stage 1 sleep) of TST, %N2 (stage 2 sleep) of TST, %N3 (SWS) of TST,  
12  
13 %WAKE of TST, %REM of TST, and REM Latency (REML). The Euclidean squared distance measure of  
14  
15 similarity was used to group patients according to the included variables.  
16  
17  
18  
19  
20

21  
22 There were 6 clustering iterations overall (going from 8 clusters to 2). The fourth iteration was  
23  
24 chosen as saturation point as it was where the agglomeration schedule and dendrogram had the  
25  
26 highest reduction in the number of groupings (from six groups to four groups = reduction of 33%)  
27  
28 whilst retaining at least 5% of the total sample size in each group (i.e.  $n \geq 11$ ). This latter rule was  
29  
30 chosen to afford sufficient power for inferential data analysis to occur.  
31  
32  
33  
34  
35

36  
37 A one-way ANOVA was undertaken on the four groups to determine which sleep variables  
38  
39 significantly differentiated the groups. There were no overall differences between the groups on age  
40  
41 ( $p = .12$ ) or BMI ( $p = .48$ ). On inspection of the sex frequencies in each group, there was a higher ratio  
42  
43 of males to females in the first group compared to the other three groups. However, as two groups  
44  
45 contained less than 5 males this could not be tested statistically. In relation to the polysomnography  
46  
47 variables there were no group differences in the number of arousals per hour or AHI index scores  
48  
49 (PLMs were not included as less than 10% of the total sample had a PLM index), but significant  
50  
51 differences were observed on all the other sleep variables (Table 2).  
52  
53  
54  
55  
56  
57  
58  
59  
60

Table 2: Characteristics of sample of individuals with CFS

| Grouped Variable Clusters        | Group 1 (N = 14)  | Group 2 (N = 55)  | Group 3 (N = 146) | Group 4 (N = 24) | F      | p      |
|----------------------------------|-------------------|-------------------|-------------------|------------------|--------|--------|
| <b>Demographics</b>              |                   |                   |                   |                  |        |        |
| Age                              | 35.79 (12.39)     | 37.29 (12.72)     | 32.99 (10.82)     | 35.54 (14.49)    | 1.95   | n.s.   |
| Sex                              | 5 Males (35.71%)  | 10 Males (17.65%) | 14 Males (9.59%)  | 1 Male (4.17%)   | **     | **     |
| BMI                              | 24.86 (5.68)      | 23.85 (4.63)      | 23.41 (4.03)      | 22.81 (3.86)     | 0.82   | n.s.   |
| <b>Sleep Variables</b>           |                   |                   |                   |                  |        |        |
| Total Sleep Time (minutes)       | 270.95 (41.85)ab  | 387.03 (46.1)acd  | 473.21 (45.82)bce | 264.15 (74.43)de | 188.07 | p<.001 |
| Sleep Onset Latency (minutes)    | 107.79 (42.09)abc | 30.97 (29.13)ad   | 19.17 (14.71)bd   | 28.94 (27.54)c   | 67.26  | p<.001 |
| Wake After Sleep Onset (minutes) | 75.79 (39.35)ab   | 82.12 (45.25)cd   | 35.45 (25.39)ace  | 180.2 (58.48)bde | 119.74 | p<.001 |
| Number of Awakenings (over TSP)  | 15.21 (8.06)      | 14.75 (11.62)ab   | 9.54 (5.85)a      | 16.96 (9.26)b    | 10.52  | p<.001 |
| Number of Arousals               | 3.57 (9.21)       | 10.91 (23.01)     | 6.2 (15.26)       | 1.38 (4.13)      | 2.24   | n.s.   |
| REM Latency                      | 173.22 (55.03)abc | 57.71 (34.31)ad   | 47.01 (28.22)be   | 84.46 (48.21)cde | 63     | p<.001 |
| AHI Index                        | 3.43 (3.46)       | 4.58 (4.39)       | 4.73 (4.04)       | 3.54 (4.19)      | 0.92   | n.s.   |
| % N1 (of TST)                    | 21.84 (13.36)a    | 14.35 (9.14)b     | 12.55 (7.37)ac    | 24.22 (14.82)bc  | 14.15  | p<.001 |
| % N2 (of TST)                    | 27.57 (13.15)ab   | 38.82 (12.36)a    | 38.44 (12.14)b    | 36.95 (13.66)    | 3.46   | p<.02  |
| % N3 (of TST)                    | 44.46 (20.45)abc  | 31.07 (11.05)a    | 31.78 (12.41)b    | 29.28 (16.42)c   | 4.64   | p<.004 |
| % REM (of TST)                   | 6.11 (4.58)abc    | 15.16 (5.47)ad    | 17.19 (5.57)be    | 9.65 (6.35)cde   | 26.46  | p<.001 |
| % WAKE (of TSP)                  | 60.32 (21.09)abc  | 25.75 (11.61)ade  | 11.03 (6.16)bdf   | 75.26 (22.92)cef | 271.62 | p<.001 |

**Notes**

Letters sharing the same subscript are significantly different

\*\*Statistical tests of between-group sex differences could not be performed due to the small number of men in each group

*First Phenotype*

The first phenotype comprised 14 patients with the longest Sleep Onset and REM Latencies and the highest percentage of SWS. Moreover, this group had the lowest percentages of both Stage 2 sleep and REM sleep. Statistically; this phenotype differed from the other three groups in terms of longer Sleep Onset and REM latencies, and a lower percentage of REM.

*Second Phenotype*

The second phenotype comprised 55 patients with the highest percentage of Stage 2 sleep and the highest number of arousals per hour although neither of these variables statistically separated them from all three other phenotypes.

*Third Phenotype*

The third phenotype comprised 146 patients with the highest Total Sleep Time and percentage of REM. Additionally, this group demonstrated the shortest Sleep Onset and REM Latencies, lowest wake after sleep onset and percentages of wake time and Stage 1 sleep, and the lowest number of

1  
2  
3 awakenings. Statistically, Total Sleep Time, percentage wake, and wake after sleep onset  
4  
5 differentiated this phenotype from each of the others.  
6  
7

#### 8 *Fourth Phenotype*

9

10  
11 The fourth phenotype comprised 24 patients who demonstrated the highest wake after sleep onset,  
12  
13 percentages of wake and Stage 1 sleep, and the highest number of awakenings. This group were also  
14  
15 the lowest in terms of Total Sleep Time, number of arousals per hour, and percentage of SWS.  
16  
17 Statistically, only wake after sleep onset and percentage of wake differentiated this group from each  
18  
19 of the others.  
20  
21  
22  
23  
24

#### 25 DISCUSSION

26

27  
28 The aim of the study was to determine whether specific sleep phenotypes existed in patients with  
29  
30 CFS. A large consecutive series of patients, meeting criteria for CFS, underwent a single night of  
31  
32 polysomnography to determine the presence or absence of distinct sleep phenotypes. The first  
33  
34 finding, over 30% of individuals meeting diagnostic criteria for CFS also demonstrated a Primary  
35  
36 Sleep Disorder (sleep apnoea or PLMD) is important and underscores the need to assess for Primary  
37  
38 Sleep Disorders (PSDs) in CFS populations. As recommended treatment strategies for some PSDs  
39  
40 differ considerably from those for CFS (e.g. Continuous Positive Airway Pressure for apnoea vs. sleep  
41  
42 management strategies in CFS) it is important to direct the individual to, or adjunct, appropriate care  
43  
44 pathways as soon as possible. This finding also questions the ability to differentiate fatigue  
45  
46 associated with sleep apnoea or PLMD from that associated with CFS. Here family members and/or  
47  
48 carers may be helpful for diagnosis sensitivity as they are likely to be aware of nocturnal breathing  
49  
50 disturbances (i.e. heavy snoring, gasping or pauses in breathing).  
51  
52  
53  
54  
55  
56  
57  
58  
59  
60



1  
2  
3 The overall PSG results (after excluding sleep apnoea and PLMD) confirm objective sleep difficulties  
4  
5 in patients with CFS. When comparing percentages of each sleep stage in 'normal' adult sleepers (i.e.  
6  
7  $\leq 5\%$  wake, between 2-5% stage 1, between 45-55% stage 2, between 13-23% SWS, and between 20-  
8  
9 25% REM<sup>53</sup>) to the present sample this group fall outside the range on all these variables. The  
10  
11 present sample are spending more time awake and in the lighter stages of sleep (stage 1 and 2  
12  
13 sleep), and less time in deeper sleep stages of sleep (i.e. stage 2 sleep and SWS) and in REM. Further,  
14  
15 using the quantitative benchmarks of sleep disturbance outlined by Edinger<sup>54</sup> it can be seen that  
16  
17 where sleep efficiency and sleep latencies appear to be on the cusp of 'normal' sleep in the present  
18  
19 sample (85% sleep efficiency is considered normal and a sleep latency of  $\geq 30$  denotes a sleep  
20  
21 problem), wake after sleep onset appears to be almost twice as long as is considered problematic  
22  
23 ( $\geq 30$  minutes tends to denote a sleep problem). Together, these findings indicate that sleep is an  
24  
25 objectively verifiable problem for patients with CFS that should be addressed clinically.  
26  
27  
28  
29  
30  
31

32  
33 The cluster analysis identified, at saturation, four sleep phenotypes. The dendrogram identified two  
34  
35 groups partially related (i.e. groups one and four) and two that were largely independent (i.e. groups  
36  
37 two and three). This configuration was confirmed by the ANOVA showing statistically significant  
38  
39 differences in sleep continuity and architecture variables between the groups. That said, where  
40  
41 statistical significance and relative characterisation (e.g. highest in variable WX and Y and lowest in  
42  
43 variable Z) are important in understanding between-group differences the more salient question is  
44  
45 whether these four groups are clinically relevant in terms of specific sleep treatments in patients  
46  
47 with CFS. The use of different pharmacological agents (benzodiazepines, z-hypnotics, or stimulants)  
48  
49 or therapeutic interventions (i.e. Cognitive Behavioural Therapy for Insomnia or behavioural  
50  
51 modification strategies) has been shown to have differential effects on specific aspects of sleep  
52  
53 continuity and architecture. For example, zolpidem appears to have a better impact on the number  
54  
55 of awakenings and perceived quality of sleep compared to nitrazepam, and lormetazepam appears  
56  
57  
58  
59  
60

better in reducing sleep latencies than zopiclone<sup>55</sup>. As such tailoring treatment options to the presenting sleep problems in this population is likely to be more effective (Table 3).

Table 3: Characteristics (statistical and phenomenological) of patients with CFS

| Sleep Phenotype | Central Differential Features                                                                                      | Associated Diagnostic Features                                                                                                            | How this may present subjectively                                                                                                                                         |
|-----------------|--------------------------------------------------------------------------------------------------------------------|-------------------------------------------------------------------------------------------------------------------------------------------|---------------------------------------------------------------------------------------------------------------------------------------------------------------------------|
| 1               | Long Sleep Onset Latency<br>Long REM Latency<br>High amounts of Slow Wave Sleep<br>Low amounts of REM              | Low amounts of Stage 2 Sleep                                                                                                              | Problems in getting off to sleep but when asleep few awakenings. The Sleep that is obtained is of normal quality.                                                         |
| 2               |                                                                                                                    | High number of arousals per hour<br>High amounts of Stage 2 Sleep                                                                         | No difficulties in getting off to sleep and few awakenings but feelings or evidence of a 'restless' nights sleep                                                          |
| 3               | High Total Sleep Time<br>Low amounts of time awake during the night<br>Low number of wake periods during the night | High amounts of REM Sleep<br>Short Sleep Onset Latency<br>Low number of Awakenings<br>Short REM Latencies<br>Low amounts of Stage 1 Sleep | No difficulties in getting off to sleep and few awakenings but feelings of being unrefreshed on waking despite a significant amount of time in bed asleep.                |
| 4               | Highest number of wake periods during the night<br>Highest amounts of time awake during the night                  | Low Total Sleep Time<br>Low number of arousals per hour during the night<br>Low amounts of Slow Wave Sleep                                | Short sleep duration and although no difficulties getting off to sleep lots of awakenings for significant periods of time. Also increased feelings of daytime sleepiness. |

Another, albeit related, consideration is the presence within the final sample of PSDs for which PSG is either not routinely recommended or where stand-alone it is insufficient for a definitive diagnosis<sup>52</sup>. Most relevant to the present sample are insomnia disorder and hypersomnolence disorders. Interestingly, groups one and four appear to be characterised by insomnia-like symptoms (i.e. difficulties initiating sleep or maintaining sleep) whereas groups two and three appear to share overlapping characteristics with disorders characterised by poor sleep quality (Table 2). In relation to group three there is some overlap with hypersomnolence disorders (the term hypersomnolence will replace hypersomnia under the DSM-5) as 14 patients (9.59%) slept for nine hours or longer and eight patients (5.48%) demonstrated the main polysomnographically defined symptom of narcolepsy (i.e. a REM Latency of less than 15 minutes). For group two there is no obvious overlap with a

1  
2  
3 specific DSM-5-defined sleep disorder although as Stage 2 sleep has been associated with hormonal  
4 and autonomic regulation<sup>56</sup> increased amounts are likely to relate to both higher levels of autonomic  
5 and cortical arousal inhibiting deep sleep. As such, a PSG study with adjunct sleep history interviews,  
6 sleep diaries, actigraphy, and/or Multiple Sleep Latency Test or Maintenance of Wakefulness test  
7 would be valuable tools in determining whether these groups share all the diagnostic features of  
8 each PSD.  
9  
10  
11  
12  
13  
14  
15  
16  
17  
18  
19

20 The findings from the present study should be viewed with limitations in mind. There was no control  
21 group to determine the extent to which the four phenotypes exist in the general population. That  
22 said, with 6-10% of the population meeting diagnostic criteria for insomnia<sup>57</sup> and 5% meeting  
23 diagnostic criteria for hypersomnia<sup>58</sup> the present data do not reflect this with 213 of the 239 (89.1%)  
24 participants, without apnoea or PLMS, meeting at least one quantitative criteria for insomnia or  
25 hypersomnia. It could also be argued that a single night of polysomnography may not be enough to  
26 capture the sleep of patients with CFS due to the first-night-effect<sup>45</sup>. The first-night-effect is a  
27 commonly observed response to the first night of sleeping in an unusual environment, such as a  
28 sleep laboratory, whereby aspects of sleep can be affected. That said, where Le Bon and colleagues  
29 demonstrated significant differences between nights one and two in a cohort of individuals with CFS,  
30 these differences were not largely evident in the sleep architecture and many differences in the  
31 sleep continuity variables disappeared after those with psychiatric illnesses were excluded from the  
32 analysis. Interestingly, over 25% of Le Bon et al's<sup>45</sup> sample also demonstrated an 'inverse first-night-  
33 effect' whereby they slept better on the first night compared to the second. This issue of the first-  
34 night-effect in CFS is further complicated by other studies which have shown no such effect in this  
35 population<sup>31</sup>. It is likely that inconsistencies in the first-night-effect reflect typical night-to-night  
36 variability<sup>59-61</sup> in addition to situation-specific factors, such as acclimating to a new environment,  
37 relating to the PSG on the first and second nights. What would be ideal, albeit expensive, is a PSG  
38  
39  
40  
41  
42  
43  
44  
45  
46  
47  
48  
49  
50  
51  
52  
53  
54  
55  
56  
57  
58  
59  
60

1  
2  
3 study over several nights (e.g. at least fourteen continuous nights are suggested for insomnia<sup>62</sup>) to  
4  
5 ensure these issues are accounted for. That said, what may be more practical is to determine how  
6  
7 information from the present study can inform, in conjunction with other assessments, actual  
8  
9 clinical practice. One suggestion is, ideally after ruling out PSDs, individuals should be interviewed  
10  
11 about their sleep (usually over the last month) and provide a sleep diary. This information would  
12  
13 provide a subjective account that could be matched to the four phenotypes (as in Table 3) to inform  
14  
15 treatment.  
16  
17  
18  
19  
20

21  
22 Overall, the results suggest a significant overlap between CFS and a variety of symptoms of sleep  
23  
24 disturbance. One night of PSG is sufficient to tease apart, and exclude, those with apnoea and  
25  
26 periodic limb movement disorders from four other distinct sleep phenotypes in patients with CFS.  
27  
28 Interestingly, these four phenotypes tend to mirror symptoms related to sleep quality and quantity  
29  
30 that are amenable to different treatment strategies. As such, clinicians tailoring sleep-based  
31  
32 interventions for patients with CFS should be mindful of these phenotypes.  
33  
34  
35  
36  
37

38 Contributions – All authors (JGE, ZMG, VD, JLN, PdR, DD) were involved in the design of the study.  
39  
40 PdR and DD conducted the study and JGE and ZMG analysed the data. The first draft was written by  
41  
42 JGE, JLN, VD and ZMG and was edited by all authors. All authors approved the final version of the  
43  
44 manuscript.  
45  
46  
47  
48

49 Funding – This research was not funded  
50  
51  
52

53 Competing Interests – None  
54  
55  
56  
57  
58  
59  
60

1  
2  
3  
4  
5  
6  
7  
8  
9  
10  
11  
12  
13  
14  
15  
16  
17  
18  
19  
20  
21  
22  
23  
24  
25  
26  
27  
28  
29  
30  
31  
32  
33  
34  
35  
36  
37  
38  
39  
40  
41  
42  
43  
44  
45  
46  
47  
48  
49  
50  
51  
52  
53  
54  
55  
56  
57  
58  
59  
60

Provenance and peer review – Not commissioned; externally peer reviewed

Data sharing statement – No additional data are available

For peer review only

## REFERENCES

- (1) Fukuda, K., Straus, S. E., Hickie, I., et al. (1994). The chronic fatigue syndrome - a comprehensive approach to its definition and study. *Annals of Internal Medicine*, 121(12), 953-959.
- (2) Wessely, S., Chalder, T., Hirsch, S., et al. The prevalence and morbidity of chronic fatigue and chronic fatigue syndrome: A prospective primary care study. *American Journal of Public Health*, 87(9), 1449-1455.
- (3) Jason L, Richman J, Rademaker A et al. (1999). A community based study of chronic fatigue syndrome. *Arch Intern Med*, 159: 2129–2137.
- (4) Reyes, M., Nisenbaum, R., Hoaglin, et al. (2003). Prevalence and incidence of chronic fatigue syndrome in Wichita, Kansas. *Archives of internal medicine* 163(13), 1530-1536.
- (5) Kato, K., Sullivan, P. F., Evengard, B., et al. Premorbid predictors of chronic fatigue. *Archives of General Psychiatry*, 63(11), 1267-1272.
- (6) Taylor R, Jason L (2001). Sexual abuse, physical abuse, chronic fatigue, and chronic fatigue syndrome: a community-based study. *J Nerv Ment Dis* 189: 709–715.
- (7) Harvey, S. B., Wadsworth, M., Wessely, S., & Hotopf, M. (2008). Etiology of chronic fatigue syndrome: testing popular hypotheses using a national birth cohort study. *Psychosomatic Medicine*, 70(4), 488-495.
- (8) Deary, V. & Chalder, T. (2010). Personality and perfectionism in chronic fatigue syndrome: a closer look. *Psychology & Health*, 25(4), 465-475.
- (9) Buchwald, D. S., Rea, T. D., Katon W. J., et al. Acute infectious mononucleosis: characteristics of patients who report failure to recover. *The American Journal of Medicine*, 109 (7), 531-537.
- (10) Hatcher, S. & House, A. (2003). Life events, difficulties and dilemmas in the onset of chronic fatigue syndrome: a case-control study. *Psychological Medicine*, 33(7), 1185-1192.

- 1  
2  
3 (11) Gaab, J., Rohleder, N., Heitz, V., et al. (2005). Stress-induced changes in LPS-induced pro-  
4  
5 inflammatory cytokine production in chronic fatigue syndrome. *Psychoneuroendocrinology*,  
6  
7 30, 188–198.  
8  
9 (12) Cho H. J., Hotopf, M., & Wessely, S. (2005). The placebo response in the treatment of chronic  
10  
11 fatigue syndrome: a systematic review and meta-analysis. *Psychosomatic Medicine*, 67(2),  
12  
13 301-13.  
14  
15 (13) Nijs, J., Meeus, M., Van Oosterwijck, J., et al. (2012). In the mind or in the brain? Scientific  
16  
17 evidence for central sensitisation in chronic fatigue syndrome. *European Journal of Clinical*  
18  
19 *Investigation*, 42(2), 203-212.  
20  
21 (14) Meeus, M., & Nijs, J. (2007). Central sensitization: a biopsychosocial explanation for chronic  
22  
23 widespread pain in patients with fibromyalgia and chronic fatigue syndrome. *Clinical*  
24  
25 *Rheumatology*, 26(4), 465-473.  
26  
27 (15) Jones, D. E., Hollingsworth, K. G., Taylor, R., et al. (2010).  
28  
29 Abnormalities in pH handling by peripheral muscle and potential regulation by the  
30  
31 autonomic nervous system in chronic fatigue syndrome. *Journal of Internal Medicine*, 267(4),  
32  
33 394-401.  
34  
35 (16) Newton, J. L., Pairman, J., Hallsworth, K., et al. Physical  
36  
37 activity intensity but not sedentary activity is reduced in chronic fatigue syndrome and is  
38  
39 associated with autonomic regulation. *International Journal of Medicine*, 104(8), 681-687.  
40  
41 (17) Candy, J. V., Meyer, A. W., Poggio, A. J., & Guidry, B. L. (2004). Time-reversal processing for an  
42  
43 acoustic communications experiment in a highly reverberant environment. *The Journal of*  
44  
45 *the Acoustical Society of America*, 115(4), 1621-1631.  
46  
47 (18) Moss-Morris R, Spence M, Hou R (2010). The pathway from glandular fever to chronic fatigue  
48  
49 syndrome: can the cognitive behavioural model provide the map? *Psychol Med*, 41(5), 1099-  
50  
51 101.  
52  
53  
54  
55  
56  
57  
58  
59  
60

- 1  
2  
3 (19) Moss-Morris, R., Deary, V. & Castell, B. (2012). Chronic Fatigue Syndrome. Chapter 25 In:  
4  
5 Barnes, M. P., & Good, D. C. (Eds.). (2012). *Neurological Rehabilitation: Handbook of Clinical*  
6  
7 *Neurology* (Series Editors: Aminoff, Boller and Swaab) (Vol. 110). Elsevier.  
8  
9  
10 (20) Komaroff, A. L., & Buchwald, D. (1991). Symptoms and signs of chronic fatigue syndrome.  
11  
12 *Reviews of infectious diseases, 13 Suppl 1, S8-11.*  
13  
14 (21) Manu, P., Lane, T. J., & Matthews, D. A. (1988). The frequency of the chronic fatigue syndrome  
15  
16 in patients with symptoms of persistent fatigue. *Annals of Internal Medicine, 109(7), 554-*  
17  
18 *556.*  
19  
20 (22) Gotts, Z. M. Unpublished PhD Thesis  
21  
22 (23) Nisenbaum, R., Jones, J. F., Unger, E. R., et al. A population-based study of the clinical course of  
23  
24 chronic fatigue syndrome. *Health and Quality of Life Outcomes, 1, 49.*  
25  
26 (24) Turner, T. H., Drummond, S., Salamat, J. S., & Brown, G. G. (2007). Effects of 42 hr of total sleep  
27  
28 deprivation on component processes of verbal working memory. *Neuropsychology, 21(6),*  
29  
30 *787.*  
31  
32 (25) Van Cauter, E., Leproult, R., & Plat, L. (2000). Age-related changes in slow wave sleep and REM  
33  
34 sleep and relationship with growth hormone and cortisol levels in healthy men. *JAMA: the*  
35  
36 *journal of the American Medical Association, 284(7), 861-868.*  
37  
38 (26) Stickgold, R. (2005). Sleep-dependent memory consolidation. *Nature, 437(7063), 1272-1278.*  
39  
40 (27) Roberts, A. D. L., Wessely, S., Chalder, T., et al. Salivary  
41  
42 cortisol response to awakening in chronic fatigue syndrome. *British Journal of Psychiatry,*  
43  
44 *184, 136-141.*  
45  
46 (28) Buchwald, D., Pascualy, R., Bombardier, C., & Kith, P. (1994). Sleep disorders in patients with  
47  
48 chronic fatigue. *Clinical infectious diseases : an official publication of the Infectious Diseases*  
49  
50 *Society of America, 18(1), S68-72.*  
51  
52  
53  
54  
55  
56  
57  
58  
59  
60



- 1  
2  
3 (29) Krupp, L. B., Jandorf, L., Coyle, P. K., & Mendelson, W. B. (1993). Sleep disturbance in chronic  
4  
5 fatigue syndrome. *Journal of Psychosomatic Research*, 37(4), 325-331.  
6  
7 (30) Manu, P., Lane, T. J., Matthews, D. A., et al. Alpha-delta sleep in patients with a chief complaint  
8  
9 of chronic fatigue. *Southern medical journal*, 87(4), 465-470.  
10  
11 (31) Whelton, C. L., Salit, I., & Moldofsky, H. (1992). Sleep, epstein-barr virus infection,  
12  
13 musculoskeletal pain, and depressive symptoms in chronic fatigue syndrome. *J Rheumatol*,  
14  
15 19(6), 939-943.  
16  
17 (32) Creti, L., Libman, E., Baltzan, M., et al. Impaired sleep in chronic fatigue syndrome how is it best  
18  
19 measured? *Journal of Health Psychology*, 15(4), 596-607.  
20  
21 (33) Decker, M. J., Tabassum, H., Lin, J. M. S., & Reeves, W. C. (2009). Electroencephalographic  
22  
23 correlates of chronic fatigue syndrome. *Behavioral and Brain Functions*, 5.  
24  
25 (34) Fossey, M., Libman, E., Bailes, S., et al. (2004). Sleep quality and psychological adjustment in  
26  
27 chronic fatigue syndrome. *Journal of Behavioral Medicine*, 27(6), 581-605.  
28  
29 (35) Kishi, A., Natelson, B. H., Togo, F., et al. Sleep  
30  
31 stage transitions in chronic fatigue syndrome patients with or without fibromyalgia. *Conf*  
32  
33 *Proc IEEE Eng Med Biol Soc*, 1, 5391-5394.  
34  
35 (36) Watson, N. F., Jacobsen, C., Goldberg, J., et al. Subjective and objective sleepiness in  
36  
37 monozygotic twins discordant for chronic fatigue syndrome. *Sleep*, 27(5), 973-977.  
38  
39 (37) Armitage, R., Landis, C., Hoffmann, R., et al. (2007). The impact of a 4-hour sleep delay on slow  
40  
41 wave activity in twins discordant for chronic fatigue syndrome. *Sleep*, 30(5), 657-662.  
42  
43 (38) Ball, N., Buchwald, D. S., Schmidt, D., et al. Monozygotic twins discordant for chronic fatigue  
44  
45 syndrome - objective measures of sleep. *Journal of Psychosomatic Research*, 56(2), 207-212.  
46  
47 (39) Fischler, B., LeBon, O., Hoffmann, G., et al. Sleep anomalies in the chronic fatigue syndrome - a  
48  
49 comorbidity study. *Neuropsychobiology*, 35(3), 115-122.  
50  
51  
52  
53  
54  
55  
56  
57  
58  
59  
60

- 1  
2  
3 (40) Majer, M., Jones, J. F., Unger, E. R., et al. (2007). Perception versus polysomnographic  
4  
5 assessment of sleep in cfs and non-fatigued control subjects: Results from a population-  
6  
7 based study. *BMC Neurology*, 7.  
8  
9 (41) Reeves, W. C., Heim, C., Maloney, E. M., et al. (2006). Sleep characteristics of persons with  
10  
11 chronic fatigue syndrome and non-fatigued controls: Results from a population-based study.  
12  
13 *BMC Neurology*, 6.  
14  
15 (42) Stores, G., Fry, A., & Crawford, C. (1998). Sleep abnormalities demonstrated by home  
16  
17 polysomnography in teenagers with chronic fatigue syndrome. *Journal of Psychosomatic*  
18  
19 *Research*, 45(1), 85-91.  
20  
21 (43) Van Hoof, E., De Becker, P., Lapp, C., et al. Defining the occurrence and influence of alpha-delta  
22  
23 sleep in chronic fatigue syndrome. *American Journal of the Medical Sciences*, 333(2), 78-84.  
24  
25 (44) Watson, N. F., Kapur, V., Arguelles, et al. (2003). Comparison of subjective and objective  
26  
27 measures of insomnia in monozygotic twins discordant for chronic fatigue syndrome. *Sleep*,  
28  
29 26(3), 324-328.  
30  
31 (45) Le Bon, O., Minner, P., Van Moorsel, C., et al. (2003). First-night effect in the chronic fatigue  
32  
33 syndrome. *Psychiatry Research*, 120(2), 191-199.  
34  
35 (46) Le Bon, O., Neu, D., Valente, F., & Linkowski, P. (2007). Paradoxical nrems distribution in "pure"  
36  
37 chronic fatigue patients: A comparison with sleep apnea-hypopnea patients and healthy  
38  
39 control subjects. *Journal of Chronic Fatigue Syndrome*, 14(2), 45-60.  
40  
41 (47) Morriss, R., Sharpe, M., Sharpley, A. L., et al. Abnormalities of sleep in patients with the chronic  
42  
43 fatigue syndrome. *British Medical Journal*, 306(6886), 1161-1164.  
44  
45 (48) Sharpley, A., Clements, A., Hawton, K., & Sharpe, M. (1997). Do patients with "pure" chronic  
46  
47 fatigue syndrome (neurasthenia) have abnormal sleep? *Psychosomatic Medicine*, 59(6), 592-  
48  
49 596.  
50  
51  
52  
53  
54  
55  
56  
57  
58  
59  
60

- 1  
2  
3 (49) Togo, F., Natelson, B. H., Cherniack, N. S., et al. Sleep structure and sleepiness in chronic fatigue  
4  
5 syndrome with or without coexisting fibromyalgia. *Arthritis Research & Therapy*, 10(3).  
6  
7 (50) Guilleminault, C., Poyares, D., da Rosa, A., et al. Chronic fatigue, unrefreshing sleep and  
8  
9 nocturnal polysomnography. *Sleep Medicine*, 7(6), 513-520.  
10  
11 (51) Rahman, K. B., A. Galbraith, S. Lloyd, A. & Vollmer-Conna, U. (2011). Sleep-wake behavior in  
12  
13 chronic fatigue syndrome. *Sleep*, 34(5), 671-678.  
14  
15 (52) American Academy of Sleep Medicine. (2007) *The AASM manual for the scoring of sleep and*  
16  
17 *associated events : rules, terminology and technical specifications*. Washington DC. Author.  
18  
19 (53) Carskadon, M. & Dement, W.C. (2011). Normal human sleep: An overview. Chapter 2 In Kryger,  
20  
21 M.H., Roth, T. & Dement, W.C. *Principles and Practice of Sleep Medicine* (5<sup>th</sup> Edition).  
22  
23 Elsevier: Missouri.  
24  
25 (54) Edinger, J. D., Bonnet, M. H., Bootzin, R. R., et al. (2004). Derivation of research diagnostic  
26  
27 criteria for insomnia: report of an American Academy of Sleep Medicine Work Group. *Sleep*,  
28  
29 27(8), 1567-1596.  
30  
31 (55) Dündar, Y., Dodd, S., Strobl, J., et al. Comparative efficacy of newer hypnotic drugs for the  
32  
33 short-term management of insomnia: a systematic review and meta-analysis. *Human*  
34  
35 *Psychopharmacology: Clinical and Experimental*, 19(5), 305-322.  
36  
37 (56) Brandenberger, G., Buchheit, M., Ehrhart, J., et al. Is slow wave sleep  
38  
39 an appropriate recording condition for heart rate variability analysis? *Autonomic*  
40  
41 *Neuroscience*, 121(1), 81-86.  
42  
43 (57) Dauvilliers, Y. (2006). Differential diagnosis in hypersomnia. *Current neurology and neuroscience*  
44  
45 *reports*, 6(2), 156-162.  
46  
47 (58) Ohayon, M. M. (2002). Epidemiology of insomnia: what we know and what we still need to  
48  
49 learn. *Sleep medicine reviews*, 6(2), 97-111.  
50  
51  
52  
53  
54  
55  
56  
57  
58  
59  
60

1  
2  
3 (59) Buysse, D. J., Cheng, Y., Germain, A., et al. (2010). Night-to-night sleep variability in older adults  
4  
5 with and without chronic insomnia. *Sleep medicine*, 11(1), 56.  
6

7 (60) Perlis, M.L., Swinkles, C.M., Gherman, P.R., et al. The incidence and temporal patterning of  
8  
9 insomnia: a pilot study. *Journal of Sleep Research*, 19(1), 31-35.  
10

11 (61) Vallieres, A., Ivers, H., Beaulieu-Bonneau, S. & Morin, C.M. (2011). Predictability of Sleep in  
12  
13 Patients with Insomnia. *Sleep*, 34(5), 609-617.  
14

15 (62) Wohlgemuth, W.K., Edinger, J.D., Fins, A.I. & Sullivan, R.J. (1999). How many nights are enough?  
16  
17 The short-term stability of sleep parameters in elderly insomniacs and normal sleepers.  
18  
19 *Psychophysiology*, 36(2), 233-244.  
20  
21  
22  
23  
24  
25  
26  
27  
28  
29  
30  
31  
32  
33  
34  
35  
36  
37  
38  
39  
40  
41  
42  
43  
44  
45  
46  
47  
48  
49  
50  
51  
52  
53  
54  
55  
56  
57  
58  
59  
60

1  
2  
3  
4  
5  
6  
7 Are there sleep-specific phenotypes in patients with Chronic Fatigue Syndrome? A cross-sectional  
8  
9 Polysomnography analysis  
10

11  
12 Zoe M. Gotts MSc<sup>a</sup>, Vincent Deary PhD<sup>a</sup>, Julia Newton MD<sup>b</sup>, Donna van der Dussen MD<sup>c</sup>, Pierre de  
13  
14 Roy MD<sup>c</sup>, Jason G. Ellis PhD<sup>a\*</sup>  
15

16  
17  
18 \* Corresponding Author  
19 Dr Jason G Ellis  
20 Northumbria Centre for Sleep Research  
21 School of Life Sciences  
22 Northumbria University  
23 138 Northumberland Building  
24 Newcastle-upon-Tyne  
25 NE1 8ST  
26 [Jason.ellis@northumbria.ac.uk](mailto:Jason.ellis@northumbria.ac.uk)  
27 +44(0)1912273081  
28  
29  
30  
31  
32  
33  
34  
35  
36

- 37  
38 a) Northumbria Centre for Sleep Research, Northumbria University, Newcastle, UK  
39 b) Institute for Ageing and Health, Newcastle University, Newcastle, UK  
40 c) VermoeidheidCentrum Nederland bv, Lelystad, Netherlands  
41  
42  
43  
44  
45  
46  
47  
48  
49  
50  
51  
52  
53  
54

1  
2  
3  
4  
5  
6  
7 ABSTRACT

8  
9 Objectives: Despite sleep disturbances being a central complaint in patients with Chronic Fatigue  
10 Syndrome (CFS), evidence of objective sleep abnormalities, from over 30 studies, is inconsistent. The  
11 present study aimed to identify whether sleep-specific phenotypes exist in CFS and explore objective  
12 characteristics that could differentiate phenotypes, whilst also being relevant to routine clinical  
13 practice.  
14  
15  
16  
17

18  
19 Design: A cross-sectional, single-site, study.  
20  
21

22 Setting: A fatigue clinic in the Netherlands  
23  
24

25 Participants: A consecutive series of 343 ~~otherwise healthy~~ patients meeting criteria for CFS,  
26 according to the Fukuda definition.  
27  
28

29 Measures: Patients underwent a single night of polysomnography (all-night recording of  
30 Electroencephalography, Electromyography, Electrooculography, Electrocardiogram and Respiration)  
31 that were hand-scored by a researcher blind to diagnosis and patient history.  
32  
33  
34  
35

36 Results: Of the 343 patients, 104 (30.3%) were identified with a Primary Sleep Disorder explaining  
37 their diagnosis. A hierarchical cluster analysis on the remaining 239 patients resulted in four sleep  
38 phenotypes identified at saturation. Of the 239 patients, 89.1% met quantitative criteria for at least  
39 one objective sleep problem. A one-way ANOVA confirmed distinct sleep profiles for each sleep  
40 phenotype. Relatively longer sleep onset latencies, longer Rapid Eye Movement (REM) latencies, and  
41 smaller percentages of both Stage 2 and REM characterized the first phenotype. The second  
42 phenotype was characterised by more frequent arousals per hour. The third phenotype was  
43 characterised by a longer Total Sleep Time, shorter REM Latencies, and a higher percentage of REM  
44 and low percentage of wake time. The final phenotype had the shortest Total Sleep Time and the  
45 highest percentage of wake time and wake after sleep onset.  
46  
47  
48  
49  
50  
51  
52  
53

1  
2  
3  
4  
5  
6  
7  
8  
9  
10  
11  
12  
13  
14  
15  
16  
17  
18  
19  
20  
21  
22  
23  
24  
25  
26  
27  
28  
29  
30  
31  
32  
33  
34  
35  
36  
37  
38  
39  
40  
41  
42  
43  
44  
45  
46  
47  
48  
49  
50  
51  
52  
53  
54  
55  
56  
57  
58  
59  
60

Conclusions: The results highlight the need to routinely screen for Primary Sleep Disorders in clinical practice and tailor sleep interventions, based on phenotype, to patients presenting with CFS. The results are discussed in terms of matching patients' self-reported sleep to these phenotypes in clinical practice.

For peer review only

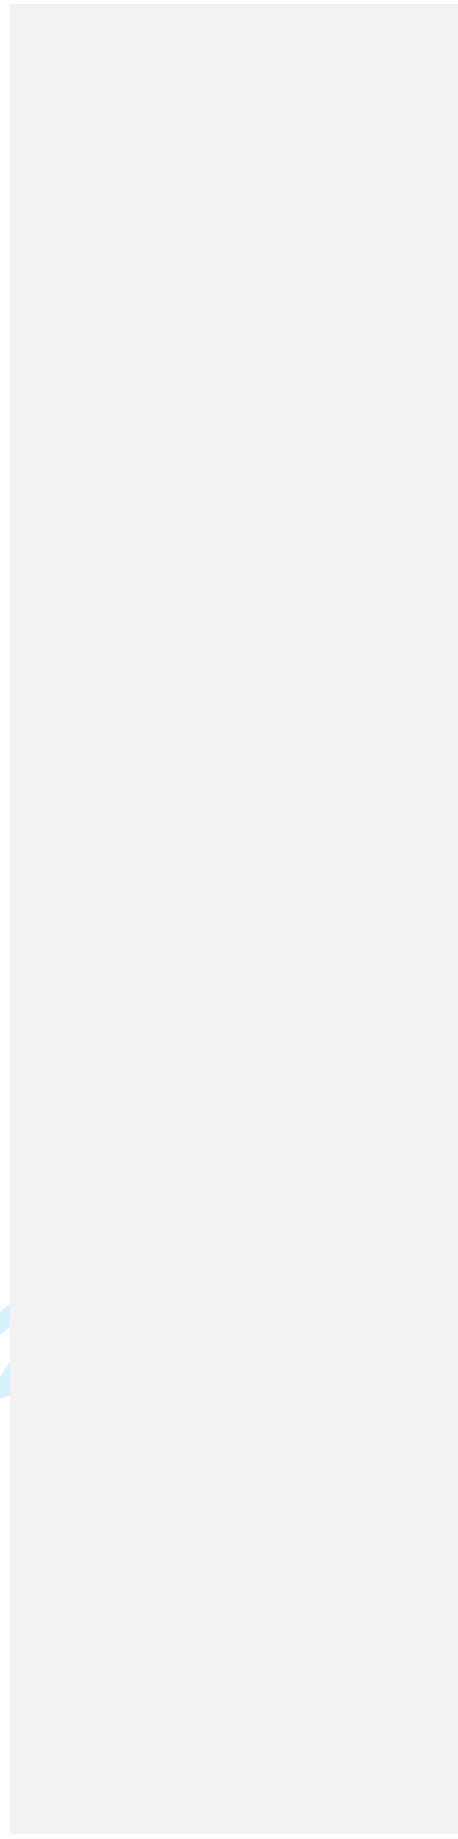

## Article Focus

- Despite 85-90% of patients with CFS reporting unrefreshing sleep, previous research has been unable to reliably identify specific irregularities in objective sleep
- To explore the possibility that sleep problems in this population are not homogeneous and that several sleep-specific phenotypes exist in this population which are amenable to different treatment approaches

## Key Messages

- Over 30% of individuals with CFS, met diagnostic criteria for Sleep Apnoea or Periodic Limb Movement Disorder that could explain their current diagnosis.
- The sleep in those with CFS, without Sleep Apnoea or Periodic Limb Movement Disorder, centred around four specific sleep-disturbed phenotypes with 89.1% demonstrating quantitative criteria for insomnia or hypersomnolence.
- Each sleep-phenotype in CFS comprised objective characteristics that could be assessed and differentiated using patient's self-reports in primary care.

## Strengths and Limitations:

- This is the first study to suggest, and identify, specific sleep-phenotypes in a large sample of patients with CFS.
- The objective findings can be easily translated and applied in routine primary care.
- A limitation is the use of a single-night of Polysomnography.



## INTRODUCTION

Chronic Fatigue Syndrome (CFS), as defined by the international consensus definition<sup>1</sup> is a condition characterised by profound fatigue, of definite onset, which has persisted for at least 6 months, and causes substantial disruption to the individual's daily functioning. In addition to fatigue, at least four other key symptoms are required to fulfil diagnostic criteria, including muscle and joint pain, headache, cognitive dysfunction and unrefreshing sleep. Thus defined, CFS affects between 0.23-2.6% of the adult population<sup>2-4</sup>. There are several theories as to the pathogenesis of CFS. However it is likely the development and maintenance of CFS is multifactorial. Predisposing factors include a general propensity to both emotional and physical distress, history of abuse, being more than usually physically active, and being perfectionist<sup>5-8</sup>. Precipitating events include viruses such as glandular fever and major life events<sup>9-10</sup>. Several factors appear to be involved in the maintenance of symptoms. Physiologically, evidence suggests dysregulation of the hypothalamic pituitary adrenal (HPA) axis, increased cytokine production and HPA responsiveness to cytokines<sup>11-12</sup>, [hypersensitivity in the Central Nervous System \(i.e. central sensitisation\)](#)<sup>13-14</sup>, and autonomic dysfunction<sup>15-16</sup>. Two studies also highlight the importance of illness beliefs and behaviours<sup>17-18</sup>. Individuals who adopt all or nothing coping styles in response to symptoms (i.e. push on through until they crash out) and attribute broad ranges of everyday symptoms to their illness are more likely to develop CFS post-virally. In sum, research suggests in CFS multiple processes in distinct domains, such as physiology, illness beliefs, inconsistent activity, sleep disturbance, medical uncertainty, and lack of guidance, can interact to maintain or exacerbate symptoms<sup>19</sup>.

As mentioned above, unrefreshing sleep is one key diagnostic characteristic of CFS<sup>1</sup>. It is also one of the most common symptom complaints<sup>20-21</sup> with 87-95% of patients reporting sleep difficulties<sup>22</sup> that do not improve over the course of the illness<sup>23</sup>. Where the purpose of sleep is subject to intense debate, its importance to human health and well-being is undeniable. Examinations of individuals

1  
2  
3  
4  
5  
6  
7 deprived or restricted of sleep consistently demonstrate deteriorations in mood, cognition, and  
8 performance<sup>24</sup>. The purpose of each different sleep stage is also unclear although it is generally  
9 agreed that the lighter stages of sleep (stage 1 sleep and stage 2 sleep) afford transitions between  
10 wakefulness and sleep and then between slow wave sleep (SWS) and Rapid Eye Movement sleep  
11 (REM). SWS and REM are believed to confer recuperative, restorative, and learning properties for  
12 the individual (e.g. the secretion of growth hormone, consolidation of memory)<sup>25-26</sup>. Therefore, the  
13 proportion of each sleep stage and timing of entry into each sleep stage, SWS and REM in particular,  
14 are important for the long-term maintenance of human physical and mental health.  
15  
16  
17  
18  
19  
20  
21  
22

23 Symptoms such as unrefreshing sleep may not only be markers of CFS but may also serve to  
24 maintain it. For instance there may be reciprocal links between sleep quality, sleep-wake regulation  
25 and fatigue. There is evidence of this, for instance, studies have shown that adopting activity and  
26 sleep management strategies improves HPA axis functioning as measured by cortisol levels<sup>27</sup>. This  
27 suggests further investigation of sleep disturbance of CFS is of more than academic importance but  
28 may highlight new avenues for intervention. From a clinical perspective it is also important to study  
29 sleep more thoroughly in CFS as it may highlight some areas of diagnostic ambiguity. For instance  
30 previous studies have shown sleep disorders (notably obstructive sleep apnoea) are occasionally  
31 identified during PSG assessments with CFS patient cohorts<sup>28-31</sup>.  
32  
33  
34  
35  
36  
37  
38  
39  
40  
41

42 Although over 30 Polysomnographic (PSG) studies on individuals with CFS exist, conclusive  
43 statements about the type of sleep abnormalities in this population are difficult. Few studies report  
44 a full characterisation of both sleep continuity (the timing, efficiency, and amount of sleep obtained)  
45 and sleep architecture (amount of each sleep or wake stage and the timing of transitions to each  
46 sleep stage), with some studies providing no PSG data at all<sup>28, 32-36</sup>. Moreover, reporting practices  
47 differ widely making interpretation and comparisons difficult (e.g. studies report the percentage of  
48  
49  
50  
51  
52  
53  
54  
55  
56  
57  
58  
59  
60

1  
2  
3  
4  
5  
6  
7 each sleep and wake stage as an index of Sleep Period Time, Total Sleep Time or even Time in Bed<sup>30-</sup>  
8 <sup>31; 37-44</sup> whilst others report minutes of each stage<sup>45-49</sup>. What can be concluded from previous PSG  
9  
10 studies is in each study deviations from 'normal sleep' exist but there is no consistent pattern. For  
11  
12 example, where two studies<sup>45-46</sup> report poor sleep efficiencies and 'normal range' REM latencies,  
13  
14 others<sup>37-38,46</sup> found 'normal range' sleep efficiencies and short REM latencies and others still report a  
15  
16 normal sleep efficiency and a long REM latency<sup>42</sup> or poor sleep efficiency and long REM latencies<sup>49</sup>.  
17  
18 Moreover, the picture remains unclear after controlling for the severity of patients' self-reported  
19  
20 sleep complaints<sup>50-51</sup>. Although differences in protocol, definitional criteria, and reporting criteria  
21  
22 may, to some extent, explain these differences, an alternative explanation is sleep difficulties in  
23  
24 individuals with CFS are not homogenous and various sleep phenotypes exist in this population.  
25  
26  
27

28  
29 To clarify the specific characterisation of sleep in CFS, the current study examined polysomnographic  
30  
31 data for a single night of sleep in a large group of CFS patients, to determine whether specific sleep  
32  
33 disturbances exist in this group, and if so, are these consistent across all patients.  
34  
35  
36

## 37 METHOD

38  
39 A cross-sectional, single-site, observational study was undertaken on a consecutive series of 343  
40  
41 patients (Mean age 37.21±12.42 years; 72 males 271 females) referred for a single-night  
42  
43 polysomnographic (PSG) study at a fatigue clinic in the Netherlands. The referral criteria for PSG  
44  
45 investigation were that the patient, a) met diagnostic criteria for CFS according the Fukuda definition  
46  
47 (1), b) they were drug-free for at least two-weeks prior to the overnight study, and c) their  
48  
49 symptoms could not be explained by a physical or psychological illness (e.g. anxiety or depression).  
50  
51 Patients gave informed consent to take part in the study and then were interviewed and medically  
52  
53  
54  
55  
56  
57  
58  
59  
60

1  
2  
3  
4  
5  
6  
7 screened for the referral criteria by a registered physician and a registered psychiatrist. [The Ethics](#)  
8  
9 [Committee for the School of Life Sciences at Northumbria University had approved the study.](#)  
10

11  
12  
13 Patients arrived at the clinic two hours before normal bedtime for electrode placement and bio-  
14 calibration. The PSG montage comprised a standard 10/20 (i.e. F<sub>4</sub>-M<sub>1</sub>, C<sub>4</sub>-M<sub>1</sub>, O<sub>2</sub>-M<sub>1</sub> and C<sub>2</sub> with  
15 backups at F<sub>3</sub>-M<sub>2</sub>, C<sub>3</sub>-M<sub>2</sub>, O<sub>1</sub>-M<sub>2</sub> and F<sub>p2</sub>). Additional channels were used for EOG (E<sub>1</sub> and E<sub>2</sub>  
16 referenced to M<sub>2</sub>), EMG (chin and anterior tibialis placements), ECG, and airflow, effort, body  
17 position, and oximetry (via pulse oximeter). Filter settings were set to American Academy of Sleep  
18 Medicine<sup>52</sup> guidelines (e.g. low 0.3Hz / high 35Hz for EEG and EOG) with a sampling rate of 500Hz.  
19 Impedances were maintained below 5KΩ. Participants [slept in the laboratory overnight and](#) were  
20 allowed to retire to bed when they wished and left to naturally wake in the morning. Scoring was  
21 conducted manually by a registered BRPT certified technician at 30-second epochs, according to  
22 AASM guidelines. The scorer was blind to the aims of the study. The mean recording period was just  
23 over 8 hours (508.5 ± 63.11 minutes). Descriptions of all sleep variables are detailed in Table 1.  
24  
25  
26  
27  
28  
29  
30  
31  
32  
33  
34  
35  
36  
37

38 Table 1: Description of sleep variables

|                                  |                                                                                        |
|----------------------------------|----------------------------------------------------------------------------------------|
| Total Sleep Time (minutes)       | Amount of time asleep                                                                  |
| Sleep Onset Latency (minutes)    | Length of time from lights out to first episode of stage 2 sleep                       |
| Wake After Sleep Onset (minutes) | Number of minutes of recorded wake following first episode of stage 2 sleep            |
| Number of Awakenings (over TSP)  | Number of wake bouts following first episode of stage 2 sleep                          |
| Number of Arousals               | Number of arousals over the entire sleep period                                        |
| Sleep Efficiency                 | Percentage of overall time spent in bed asleep                                         |
| REM Latency                      | Length of time to first REM stage                                                      |
| AHI Index                        | Number of apnoea or hypopnea events per hour of sleep                                  |
| % N1 (of TST)                    | Percentage of recorded stage 1 sleep over the total time asleep                        |
| % N2 (of TST)                    | Percentage of recorded stage 2 sleep over the total time asleep                        |
| % N3 (of TST)                    | Percentage of recorded slow wave sleep over the total time asleep                      |
| % REM (of TST)                   | Percentage of recorded Rapid Eye Movement sleep over the total time asleep             |
| % WAKE (of TSP)                  | Percentage of recorded wake over the whole sleep period (from lights out to lights on) |

39  
40  
41  
42  
43  
44  
45  
46  
47  
48  
49  
50  
51  
52  
53 [Analytic Strategy](#)  
54  
55  
56  
57  
58  
59  
60

1  
2  
3  
4  
5  
6  
7 A hierarchical Cluster Analysis was used to determine the number of phenotypes within the present  
8 sample after excluding those with Sleep Apnoea or Periodic Limb Movement Disorder. Cluster  
9 analysis is a data reduction technique that examines patterns amongst a set of variables to form  
10 homogenous groups. The Euclidean squared distance measure of similarity method was chosen for  
11 the cluster analysis as it uses the progressive distance between variables to form the groups and  
12 does not rely upon standardised data. As cluster analysis can be affected by multicollinearity, a  
13 correlation matrix was used to exclude variables that were highly correlated with one another. A  
14 One-Way Analysis Of Variance (ANOVA) was used to examine which of the sleep variables  
15 differentiated the phenotypes.  
16  
17  
18  
19  
20  
21  
22  
23  
24  
25  
26

## 27 RESULTS

28  
29 An initial examination of the Apnoea Hypopnoea Index (AHI) and Periodic Limb Movements (PLM's)  
30 indices indicated that 104 (43 males and 61 females) of the original 343 referrals (30.3%) met AASM  
31 criteria for either sleep apnoea (AHI  $\geq 15$ ; n = 101) or a periodic limb movement disorder (PLMs  $\geq 5$ ;  
32 n =17) (14 participants met criteria for both disorders). The overall sleep profile of the remaining 239  
33 patients (Mean Age 34.4 $\pm$ 11.84; 210 females and 29 males) was highly variable indicating the  
34 presence of phenotypes (Figure 1).  
35  
36  
37  
38  
39

40  
41  
42  
43  
44 Insert Figure 1 Here  
45  
46  
47  
48

49 A hierarchical cluster analysis, using Ward's method, was undertaken to determine the number of  
50 groups (clusters) within the remaining 239 patients. Prior to the cluster analysis a correlation matrix  
51 was examined to avoid multicollinearity influencing the cluster model. On this basis four variables  
52  
53  
54

1  
2  
3  
4  
5  
6  
7 were excluded (Height, Weight, Sleep Efficiency, and number of Spontaneous Arousals per hour) for  
8 having correlation coefficients with one or more variables above  $r = .8$ . The final grouping variables  
9 included in the cluster analysis were; age, sex, BMI, AHI's, PLM index, Number of Awakenings,  
10 Number of Arousals per hour, Total Sleep Time (TST), Sleep Latency (SL), Wake After Sleep Onset  
11 (WASO), percentage of %N1 (stage 1 sleep) of TST, %N2 (stage 2 sleep) of TST, %N3 (SWS) of TST,  
12 %WAKE of TST, %REM of TST, and REM Latency (REML). The Euclidean squared distance measure of  
13 similarity was used to group patients according to the included variables.  
14  
15  
16  
17  
18  
19  
20  
21  
22

23 There were 6 clustering iterations overall (going from 8 clusters to 2). The fourth iteration was  
24 chosen as saturation point as it was where the agglomeration schedule and dendrogram had the  
25 highest reduction in the number of groupings (from six groups to four groups = reduction of 33%)  
26 whilst retaining at least 5% of the total sample size in each group (i.e.  $n \geq 11$ ). This latter rule was  
27 chosen to afford sufficient power for inferential data analysis to occur.  
28  
29  
30  
31  
32  
33  
34  
35

36 A one-way ANOVA was undertaken on the four groups to determine which sleep variables  
37 significantly differentiated the groups. There were no overall differences between the groups on age

38  
39 ( $F(3,235) = 1.95, p = .12$ ) or BMI ( $F(3,235) = .82, p = .48$ ). ~~but a significant sex difference was observed~~  
40 ( $\chi^2(3) = 10.54, p < .02$ ). On inspection of the sex frequencies in each group, there was a significantly  
41 higher ratio of males to females (~~35.71% male~~) in the first group compared to the other three groups  
42 (~~17.65%, 9.59%, and 4.17% male respectively~~). ~~However, as two groups contained less than 5 males~~  
43 ~~this could not be tested statistically, although due to the number of males in the overall sample~~  
44 (~~12.13%~~) ~~this is likely to be artefact~~. In relation to the polysomnography variables there were no  
45 group differences in the number of arousals per hour or AHI index scores (PLMs were not included as  
46  
47  
48  
49  
50  
51  
52  
53  
54  
55  
56  
57  
58  
59  
60

less than 10% of the total sample had a PLM index), but significant differences were observed on all the other sleep variables (Table 2).

Table 2: Characteristics of sample of individuals with CFS

| Grouped Variable Clusters        | Group 1 (N = 14)  | Group 2 (N = 55)  | Group 3 (N = 146) | Group 4 (N = 24) | F      | p      |
|----------------------------------|-------------------|-------------------|-------------------|------------------|--------|--------|
| <b>Demographics</b>              |                   |                   |                   |                  |        |        |
| Age                              | 35.79 (12.39)     | 37.29 (12.72)     | 32.99 (10.82)     | 35.54 (14.49)    | 1.95   | n.s.   |
| Sex                              | 5 Males (35.71%)  | 10 Males (17.65%) | 14 Males (9.59%)  | 1 Male (4.17%)   | **     | **     |
| BMI                              | 24.86 (5.68)      | 23.85 (4.63)      | 23.41 (4.03)      | 22.81 (3.86)     | 0.82   | n.s.   |
| <b>Sleep Variables</b>           |                   |                   |                   |                  |        |        |
| Total Sleep Time (minutes)       | 270.95 (41.85)ab  | 387.03 (46.1)acd  | 473.21 (45.82)bce | 264.15 (74.43)de | 188.07 | p<.001 |
| Sleep Onset Latency (minutes)    | 107.79 (42.09)abc | 30.97 (29.13)ad   | 19.17 (14.71)bd   | 28.94 (27.54)c   | 67.26  | p<.001 |
| Wake After Sleep Onset (minutes) | 75.79 (39.35)ab   | 82.12 (45.25)cd   | 35.45 (25.39)ace  | 180.2 (58.48)bde | 119.74 | p<.001 |
| Number of Awakenings (over TSP)  | 15.21 (8.06)      | 14.75 (11.62)ab   | 9.54 (5.85)a      | 16.96 (9.26)b    | 10.52  | p<.001 |
| Number of Arousals               | 3.57 (9.21)       | 10.91 (23.01)     | 6.2 (15.26)       | 1.38 (4.13)      | 2.24   | n.s.   |
| REM Latency                      | 173.22 (55.03)abc | 57.71 (34.31)ad   | 47.01 (28.22)be   | 84.46 (48.21)cde | 63     | p<.001 |
| AHI Index                        | 3.43 (3.46)       | 4.58 (4.39)       | 4.73 (4.04)       | 3.54 (4.19)      | 0.92   | n.s.   |
| % N1 (of TST)                    | 21.84 (13.36)a    | 14.35 (9.14)b     | 12.55 (7.37)ac    | 24.22 (14.82)bc  | 14.15  | p<.001 |
| % N2 (of TST)                    | 27.57 (13.15)ab   | 38.82 (12.36)a    | 38.44 (12.14)b    | 36.95 (13.66)    | 3.46   | p<.02  |
| % N3 (of TST)                    | 44.46 (20.45)abc  | 31.07 (11.05)a    | 31.78 (12.41)b    | 29.28 (16.42)c   | 4.64   | p<.004 |
| % REM (of TST)                   | 6.11 (4.58)abc    | 15.16 (5.47)ad    | 17.19 (5.57)be    | 9.65 (6.35)cde   | 26.46  | p<.001 |
| % WAKE (of TSP)                  | 60.32 (21.09)abc  | 25.75 (11.61)ade  | 11.03 (6.16)bdf   | 75.26 (22.92)cef | 271.62 | p<.001 |

**Notes**

Letters sharing the same subscript are significantly different

\*\*Statistical tests of between-group sex differences could not be performed due to the small number of men in each group

*First Phenotype*

The first phenotype comprised 14 patients with the longest Sleep Onset and REM Latencies and the highest percentage of SWS. Moreover, this group had the lowest percentages of both Stage 2 sleep and REM sleep. Statistically; this phenotype differed from the other three groups in terms of longer Sleep Onset and REM latencies, and a lower percentage of REM.

*Second Phenotype*

The second phenotype comprised 55 patients with the highest percentage of Stage 2 sleep and the highest number of arousals per hour although neither of these variables statistically separated them from all three other phenotypes.

*Third Phenotype*

1  
2  
3  
4  
5  
6  
7 The third phenotype comprised 146 patients with the highest Total Sleep Time and percentage of  
8 REM. Additionally, this group demonstrated the shortest Sleep Onset and REM Latencies, lowest  
9 wake after sleep onset and percentages of wake time and Stage 1 sleep, and the lowest number of  
10 awakenings. Statistically, Total Sleep Time, percentage wake, and wake after sleep onset  
11 differentiated this phenotype from each of the others.  
12  
13  
14  
15

#### 16 *Fourth Phenotype*

17  
18 The fourth phenotype comprised 24 patients who demonstrated the highest wake after sleep onset,  
19 percentages of wake and Stage 1 sleep, and the highest number of awakenings. This group were also  
20 the lowest in terms of Total Sleep Time, number of arousals per hour, and percentage of SWS.  
21 Statistically, only wake after sleep onset and percentage of wake differentiated this group from each  
22 of the others.  
23  
24  
25  
26  
27  
28  
29  
30  
31

## 32 DISCUSSION

33  
34 The aim of the study was to determine whether specific sleep phenotypes existed in patients with  
35 CFS. A large consecutive series of patients, meeting criteria for CFS, underwent a single night of  
36 polysomnography to determine the presence or absence of distinct sleep phenotypes. The first  
37 finding, over 30% of individuals meeting diagnostic criteria for CFS also demonstrated a Primary  
38 Sleep Disorder (sleep apnoea or PLMD) is important and underscores the need to assess for Primary  
39 Sleep Disorders (PSDs) in CFS populations. As recommended treatment strategies for some PSDs  
40 differ considerably from those for CFS (e.g. Continuous Positive Airway Pressure for apnoea vs. sleep  
41 management strategies in CFS) it is important to direct the individual to, or adjunct, appropriate care  
42 pathways as soon as possible. This finding also questions the ability to differentiate fatigue  
43 associated with sleep apnoea or PLMD from that associated with CFS. Here family members and/or  
44  
45  
46  
47  
48  
49  
50  
51  
52  
53  
54



1  
2  
3  
4  
5  
6  
7 carers may be helpful for diagnosis sensitivity as they are likely to be aware of nocturnal breathing  
8 disturbances (i.e. heavy snoring, gasping or pauses in breathing).  
9

10  
11  
12  
13 The overall PSG results (after excluding sleep apnoea and PLMD) confirm objective sleep difficulties  
14 in patients with CFS. When comparing percentages of each sleep stage in 'normal' adult sleepers (i.e.  
15  $\leq 5\%$  wake, between 2-5% stage 1, between 45-55% stage 2, between 13-23% SWS, and between 20-  
16 25% REM<sup>53</sup>) to the present sample this group fall outside the range on all these variables. The  
17 present sample are spending more time awake and in the lighter stages of sleep (stage 1 and 2  
18 sleep), and less time in deeper sleep stages of sleep (i.e. stage 2 sleep and SWS) and in REM. Further,  
19 using the quantitative benchmarks of sleep disturbance outlined by Edinger<sup>54</sup> it can be seen that  
20 where sleep efficiency and sleep latencies appear to be on the cusp of 'normal' sleep in the present  
21 sample (85% sleep efficiency is considered normal and a sleep latency of  $\geq 30$  denotes a sleep  
22 problem), wake after sleep onset appears to be almost twice as long as is considered problematic  
23 ( $\geq 30$  minutes tends to denote a sleep problem). Together, these findings indicate that sleep is an  
24 objectively verifiable problem for patients with CFS that should be addressed clinically.  
25  
26  
27  
28  
29  
30  
31  
32  
33  
34  
35  
36  
37  
38

39 The cluster analysis identified, at saturation, four sleep phenotypes. The dendrogram identified two  
40 groups partially related (i.e. groups one and four) and two that were largely independent (i.e. groups  
41 two and three). This configuration was confirmed by the ANOVA showing statistically significant  
42 differences in sleep continuity and architecture variables between the groups. That said, where  
43 statistical significance and relative characterisation (e.g. highest in variable WX and Y and lowest in  
44 variable Z) are important in understanding between-group differences the more salient question is  
45 whether these four groups are clinically relevant in terms of specific sleep treatments in patients  
46 with CFS. The use of different pharmacological agents (benzodiazepines, z-hypnotics, or stimulants)  
47  
48  
49  
50  
51  
52  
53

or therapeutic interventions (i.e. Cognitive Behavioural Therapy for Insomnia or behavioural modification strategies) has been shown to have differential effects on specific aspects of sleep continuity and architecture. For example, zolpidem appears to have a better impact on the number of awakenings and perceived quality of sleep compared to nitrazepam, and lormetazepam appears better in reducing sleep latencies than zopiclone<sup>55</sup>. As such tailoring treatment options to the presenting sleep problems in this population is likely to be more effective (Table 3).

Table 3: Characteristics (statistical and phenomenological) of patients with CFS

| Sleep Phenotype | Central Differential Features                                                                                      | Associated Diagnostic Features                                                                                                            | How this may present subjectively                                                                                                                                         |
|-----------------|--------------------------------------------------------------------------------------------------------------------|-------------------------------------------------------------------------------------------------------------------------------------------|---------------------------------------------------------------------------------------------------------------------------------------------------------------------------|
| 1               | Long Sleep Onset Latency<br>Long REM Latency<br>High amounts of Slow Wave Sleep<br>Low amounts of REM              | Low amounts of Stage 2 Sleep                                                                                                              | Problems in getting off to sleep but when asleep few awakenings. The Sleep that is obtained is of normal quality.                                                         |
| 2               |                                                                                                                    | High number of arousals per hour<br>High amounts of Stage 2 Sleep                                                                         | No difficulties in getting off to sleep and few awakenings but feelings or evidence of a 'restless' nights sleep                                                          |
| 3               | High Total Sleep Time<br>Low amounts of time awake during the night<br>Low number of wake periods during the night | High amounts of REM Sleep<br>Short Sleep Onset Latency<br>Low number of Awakenings<br>Short REM Latencies<br>Low amounts of Stage 1 Sleep | No difficulties in getting off to sleep and few awakenings but feelings of being unrefreshed on waking despite a significant amount of time in bed asleep.                |
| 4               | Highest number of wake periods during the night<br>Highest amounts of time awake during the night                  | Low Total Sleep Time<br>Low number of arousals per hour during the night<br>Low amounts of Slow Wave Sleep                                | Short sleep duration and although no difficulties getting off to sleep lots of awakenings for significant periods of time. Also increased feelings of daytime sleepiness. |

Another, albeit related, consideration is the presence within the final sample of PSDs for which PSG is either not routinely recommended or where stand-alone it is insufficient for a definitive diagnosis<sup>52</sup>. Most relevant to the present sample are insomnia disorder and hypersomnolence disorders. Interestingly, groups one and four appear to be characterised by insomnia-like symptoms (i.e. difficulties initiating sleep or maintaining sleep) whereas groups two and three appear to share overlapping characteristics with disorders characterised by poor sleep quality (Table 2). In relation to

1  
2  
3  
4  
5  
6  
7 group three there is some overlap with hypersomnolence disorders (the term hypersomnolence will  
8 replace hypersomnia under the DSM-5) as 14 patients (9.59%) slept for nine hours or longer and  
9 eight patients (5.48%) demonstrated the main polysomnographically defined symptom of narcolepsy  
10 (i.e. a REM Latency of less than 15 minutes). For group two there is no obvious overlap with a  
11 specific DSM-5-defined sleep disorder although as Stage 2 sleep has been associated with hormonal  
12 and autonomic regulation<sup>56</sup> increased amounts are likely to relate to both higher levels of autonomic  
13 and cortical arousal inhibiting deep sleep. As such, a PSG study with adjunct sleep history interviews,  
14 sleep diaries, actigraphy, and/or Multiple Sleep Latency Test or Maintenance of Wakefulness test  
15 would be valuable tools in determining whether these groups share all the diagnostic features of  
16 each PSD.  
17  
18  
19  
20  
21  
22  
23  
24  
25  
26  
27

28 The findings from the present study should be viewed with limitations in mind. There was no control  
29 group to determine the extent to which the four phenotypes exist in the general population. That  
30 said, with 6-10% of the population meeting diagnostic criteria for insomnia<sup>57</sup> and 5% meeting  
31 diagnostic criteria for hypersomnia<sup>58</sup> the present data do not reflect this with 213 of the 239 (89.1%)  
32 participants, without apnoea or PLMS, meeting at least one quantitative criteria for insomnia or  
33 hypersomnia. It could also be argued that a single night of polysomnography may not be enough to  
34 capture the sleep of patients with CFS due to the first-night-effect<sup>45</sup>. The first-night-effect is a  
35 commonly observed response to the first night of sleeping in an unusual environment, such as a  
36 sleep laboratory, whereby aspects of sleep can be affected. That said, where Le Bon and colleagues  
37 demonstrated significant differences between nights one and two in a cohort of individuals with CFS,  
38 these differences were not largely evident in the sleep architecture and many differences in the  
39 sleep continuity variables disappeared after those with psychiatric illnesses were excluded from the  
40 analysis. Interestingly, over 25% of Le Bon et al's<sup>45</sup> sample also demonstrated an 'inverse first-night-  
41 effect' whereby they slept better on the first night compared to the second. This issue of the first-  
42  
43  
44  
45  
46  
47  
48  
49  
50  
51  
52  
53  
54

1  
2  
3  
4  
5  
6  
7 night-effect in CFS is further complicated by other studies which have shown no such effect in this  
8 population<sup>31</sup>. It is likely that inconsistencies in the first-night-effect reflect typical night-to-night  
9 variability<sup>59-61</sup> in addition to situation-specific factors, such as acclimating to a new environment,  
10 relating to the PSG on the first and second nights. What would be ideal, albeit expensive, is a PSG  
11 study over several nights (e.g. at least fourteen continuous nights are suggested for insomnia<sup>62</sup>) to  
12 ensure these issues are accounted for. That said, what may be more practical is to determine how  
13 information from the present study can inform, in conjunction with other assessments, actual  
14 clinical practice. One suggestion is, ideally after ruling out PSDs, individuals should be interviewed  
15 about their sleep (usually over the last month) and provide a sleep diary. This information would  
16 provide a subjective account that could be matched to the four phenotypes (as in Table 3) to inform  
17 treatment.  
18  
19  
20  
21  
22  
23  
24  
25  
26  
27  
28  
29

30 Overall, the results suggest a significant overlap between CFS and a variety of symptoms of sleep  
31 disturbance. One night of PSG is sufficient to tease apart, and exclude, those with apnoea and  
32 periodic limb movement disorders from four other distinct sleep phenotypes in patients with CFS.  
33 Interestingly, these four phenotypes tend to mirror symptoms related to sleep quality and quantity  
34 that are amenable to different treatment strategies. As such, clinicians tailoring sleep-based  
35 interventions for patients with CFS should be mindful of these phenotypes.  
36  
37  
38  
39  
40  
41  
42  
43

44 Contributions – All authors (JGE, ZMG, VD, JLN, PdR, DD) were involved in the design of the study.  
45 PdR and DD conducted the study and JGE and ZMG analysed the data. The first draft was written by  
46 JGE, JLN, VD and ZMG and was edited by all authors. All authors approved the final version of the  
47 manuscript.  
48  
49  
50  
51  
52  
53  
54  
55  
56  
57  
58  
59  
60

1  
2  
3  
4  
5  
6  
7  
8  
9  
10  
11  
12  
13  
14  
15  
16  
17  
18  
19  
20  
21  
22  
23  
24  
25  
26  
27  
28  
29  
30  
31  
32  
33  
34  
35  
36  
37  
38  
39  
40  
41  
42  
43  
44  
45  
46  
47  
48  
49  
50  
51  
52  
53  
54  
55  
56  
57  
58  
59  
60

Funding – This research was not funded

Competing Interests – None

Provenance and peer review – Not commissioned; externally peer reviewed

Data sharing statement – No additional data are available

For peer review only

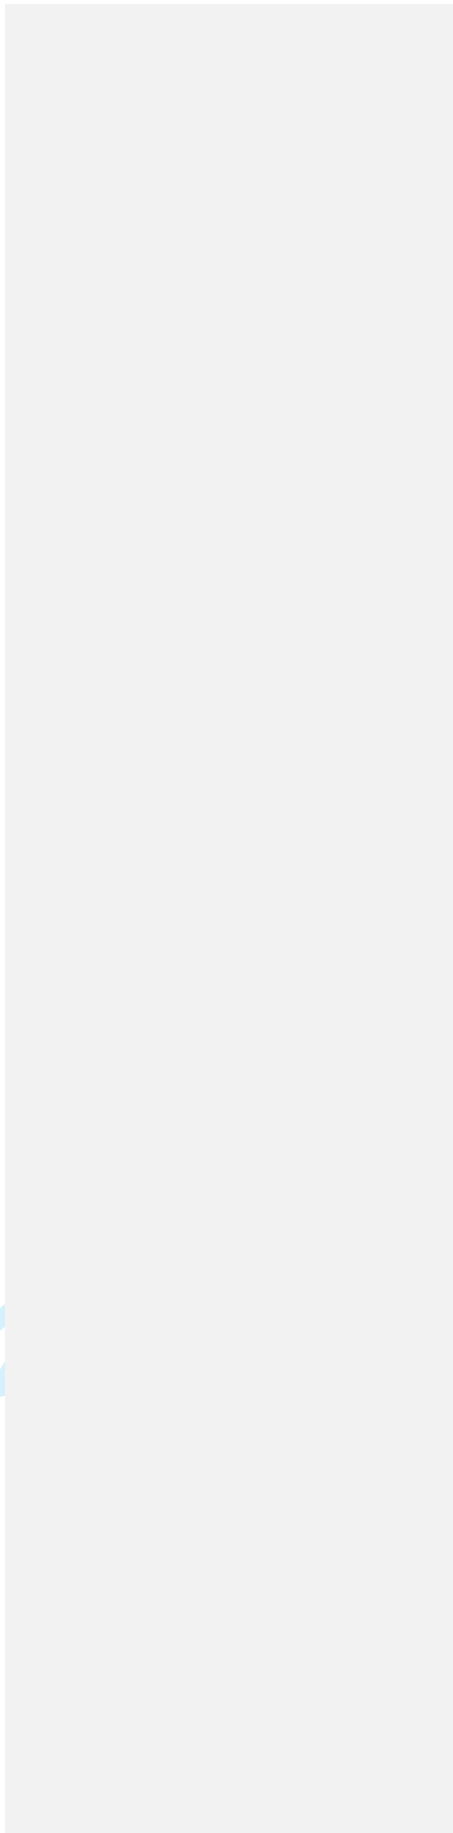

## REFERENCES

- (1) Fukuda, K., Straus, S. E., Hickie, I., et al. (1994). The chronic fatigue syndrome - a comprehensive approach to its definition and study. *Annals of Internal Medicine*, 121(12), 953-959.
- (2) Wessely, S., Chalder, T., Hirsch, S., Wallace, P., & Wright, D. (1997). The prevalence and morbidity of chronic fatigue and chronic fatigue syndrome: A prospective primary care study. *American Journal of Public Health*, 87(9), 1449-1455.
- (3) Jason L, Richman J, Rademaker A et al. (1999). A community based study of chronic fatigue syndrome. *Arch Intern Med*, 159: 2129–2137.
- (4) Reyes, M., Nisenbaum, R., Hoaglin, et al. (2003). Prevalence and incidence of chronic fatigue syndrome in Wichita, Kansas. *Archives of internal medicine* 163(13), 1530-1536.
- (5) Kato, K., Sullivan, P. F., Evengard, B., & Pedersen, N. L. (2006). Premorbid predictors of chronic fatigue. *Archives of General Psychiatry*, 63(11), 1267-1272.
- (6) Taylor R, Jason L (2001). Sexual abuse, physical abuse, chronic fatigue, and chronic fatigue syndrome: a community-based study. *J Nerv Ment Dis* 189: 709–715.
- (7) Harvey, S. B., Wadsworth, M., Wessely, S., & Hotopf, M. (2008). Etiology of chronic fatigue syndrome: testing popular hypotheses using a national birth cohort study. *Psychosomatic Medicine*, 70(4), 488-495.
- (8) Deary, V. & Chalder, T. (2010). Personality and perfectionism in chronic fatigue syndrome: a closer look. *Psychology & Health*, 25(4), 465-475.
- (9) Buchwald, D. S., Rea, T. D., Katon W. J., Russo, J. E., & Ashley, R. L. (2000). Acute infectious mononucleosis: characteristics of patients who report failure to recover. *The American Journal of Medicine*, 109 (7), 531-537.

- 1  
2  
3  
4  
5  
6  
7 (10) Hatcher, S. & House, A. (2003). Life events, difficulties and dilemmas in the onset of chronic  
8 fatigue syndrome: a case-control study. *Psychological Medicine*, 33(7), 1185-1192.  
9
- 10 (11) Gaab, J., Rohleder, N., Heitz, V., et al. (2005). Stress-induced changes in LPS-induced pro-  
11 inflammatory cytokine production in chronic fatigue syndrome. *Psychoneuroendocrinology*,  
12 30, 188-198.  
13
- 14 (12) Cho H. J., Hotopf, M., & Wessely, S. (2005). The placebo response in the treatment of chronic  
15 fatigue syndrome: a systematic review and meta-analysis. *Psychosomatic Medicine*, 67(2),  
16 301-13.  
17
- 18 (13) Nijs, J., Meeus, M., Van Oosterwijck, J., et al. (2012). In the mind or in the brain? Scientific  
19 evidence for central sensitisation in chronic fatigue syndrome. *European Journal of Clinical*  
20 *Investigation*, 42(2), 203-212.  
21
- 22 (14) Meeus, M., & Nijs, J. (2007). Central sensitization: a biopsychosocial explanation for chronic  
23 widespread pain in patients with fibromyalgia and chronic fatigue syndrome. *Clinical*  
24 *Rheumatology*, 26(4), 465-473.  
25
- 26 (15) Jones, D. E., Hollingsworth, K. G., Taylor, R., Blamire, A. M., & Newton, J. L. (2010).  
27 Abnormalities in pH handling by peripheral muscle and potential regulation by the  
28 autonomic nervous system in chronic fatigue syndrome. *Journal of Internal Medicine*, 267(4),  
29 394-401.  
30
- 31 (16) Newton, J. L., Pairman, J., Hallsworth, K., Moore, S., Plotz, T., & Trenell, M. I. (2011). Physical  
32 activity intensity but not sedentary activity is reduced in chronic fatigue syndrome and is  
33 associated with autonomic regulation. *International Journal of Medicine*, 104(8), 681-687.  
34
- 35 (17) Candy, J. V., Meyer, A. W., Poggio, A. J., & Guidry, B. L. (2004). Time-reversal processing for an  
36 acoustic communications experiment in a highly reverberant environment. *The Journal of*  
37 *the Acoustical Society of America*, 115(4), 1621-1631.  
38  
39  
40  
41  
42  
43  
44  
45  
46  
47  
48  
49  
50  
51  
52  
53  
54

Formatted: Font: Italic

- 1  
2  
3  
4  
5  
6  
7 (18) Moss-Morris R, Spence M, Hou R (2010). The pathway from glandular fever to chronic fatigue  
8 syndrome: can the cognitive behavioural model provide the map? *Psychol Med*, 41(5), 1099-  
9 101.  
10  
11 (19) Moss-Morris, R., Deary, V. & Castell, B. (2012). Chronic Fatigue Syndrome. Chapter 25 In:  
12 Barnes, M. P., & Good, D. C. (Eds.). (2012). *Neurological Rehabilitation: Handbook of Clinical*  
13 *Neurology* (Series Editors: Aminoff, Boller and Swaab) (Vol. 110). Elsevier.  
14  
15 (20) Komaroff, A. L., & Buchwald, D. (1991). Symptoms and signs of chronic fatigue syndrome.  
16 *Reviews of infectious diseases*, 13 Suppl 1, S8-11.  
17  
18 (21) Manu, P., Lane, T. J., & Matthews, D. A. (1988). The frequency of the chronic fatigue syndrome  
19 in patients with symptoms of persistent fatigue. *Annals of Internal Medicine*, 109(7), 554-  
20 556.  
21  
22 (22) Gotts, Z. M. Unpublished PhD Thesis  
23  
24 (23) Nisenbaum, R., Jones, J. F., Unger, E. R., Reyes, M., & Reeves, W. C. (2003). A population-based  
25 study of the clinical course of chronic fatigue syndrome. *Health and Quality of Life*  
26 *Outcomes*, 1, 49.  
27  
28 (24) Turner, T. H., Drummond, S., Salamat, J. S., & Brown, G. G. (2007). Effects of 42 hr of total sleep  
29 deprivation on component processes of verbal working memory. *Neuropsychology*, 21(6),  
30 787.  
31  
32 (25) Van Cauter, E., Leproult, R., & Plat, L. (2000). Age-related changes in slow wave sleep and REM  
33 sleep and relationship with growth hormone and cortisol levels in healthy men. *JAMA: the*  
34 *journal of the American Medical Association*, 284(7), 861-868.  
35  
36 (26) Stickgold, R. (2005). Sleep-dependent memory consolidation. *Nature*, 437(7063), 1272-1278.  
37  
38 (27) Roberts, A. D. L., Wessely, S., Chalder, T., Papadopoulos, A., & Cleare, A. J. (2004). Salivary  
39 cortisol response to awakening in chronic fatigue syndrome. *British Journal of Psychiatry*,  
40 184, 136-141.  
41  
42  
43  
44  
45  
46  
47  
48  
49  
50  
51  
52  
53  
54  
55  
56  
57  
58  
59  
60



- 1  
2  
3  
4  
5  
6  
7 (28) Buchwald, D., Pascualy, R., Bombardier, C., & Kith, P. (1994). Sleep disorders in patients with  
8 chronic fatigue. *Clinical infectious diseases : an official publication of the Infectious Diseases*  
9 *Society of America*, 18(1), S68-72.  
10  
11 (29) Krupp, L. B., Jandorf, L., Coyle, P. K., & Mendelson, W. B. (1993). Sleep disturbance in chronic  
12 fatigue syndrome. *Journal of Psychosomatic Research*, 37(4), 325-331.  
13  
14 (30) Manu, P., Lane, T. J., Matthews, D. A., Castriotta, R. J., Watson, R. K., & Abeles, M. (1994). Alpha-  
15 delta sleep in patients with a chief complaint of chronic fatigue. *Southern medical journal*,  
16 87(4), 465-470.  
17  
18 (31) Whelton, C. L., Salit, I., & Moldofsky, H. (1992). Sleep, epstein-barr virus infection,  
19 musculoskeletal pain, and depressive symptoms in chronic fatigue syndrome. *J Rheumatol*,  
20 19(6), 939-943.  
21  
22 (32) Creti, L., Libman, E., Baltzan, M., Rizzo, D., Bailes, S., & Fichten, C. S. (2010). Impaired sleep in  
23 chronic fatigue syndrome how is it best measured? *Journal of Health Psychology*, 15(4), 596-  
24 607.  
25  
26 (33) Decker, M. J., Tabassum, H., Lin, J. M. S., & Reeves, W. C. (2009). Electroencephalographic  
27 correlates of chronic fatigue syndrome. *Behavioral and Brain Functions*, 5.  
28  
29 (34) Fossey, M., Libman, E., Bailes, S., et al. (2004). Sleep quality and psychological adjustment in  
30 chronic fatigue syndrome. *Journal of Behavioral Medicine*, 27(6), 581-605.  
31  
32 (35) Kishi, A., Natelson, B. H., Togo, F., Struzik, Z. R., Rapoport, D. M., & Yamamoto, Y. (2010). Sleep  
33 stage transitions in chronic fatigue syndrome patients with or without fibromyalgia. *Conf*  
34 *Proc IEEE Eng Med Biol Soc*, 1, 5391-5394.  
35  
36 (36) Watson, N. F., Jacobsen, C., Goldberg, J., Kapur, V., & Buchwald, D. (2004). Subjective and  
37 objective sleepiness in monozygotic twins discordant for chronic fatigue syndrome. *Sleep*,  
38 27(5), 973-977.  
39  
40  
41  
42  
43  
44  
45  
46  
47  
48  
49  
50  
51  
52  
53  
54

- 1  
2  
3  
4  
5  
6  
7 (37) Armitage, R., Landis, C., Hoffmann, R., et al. (2007). The impact of a 4-hour sleep delay on slow  
8 wave activity in twins discordant for chronic fatigue syndrome. *Sleep*, 30(5), 657-662.  
9  
10 (38) Ball, N., Buchwald, D. S., Schmidt, D., Goldberg, J., Ashton, S., & Armitage, R. (2004).  
11 Monozygotic twins discordant for chronic fatigue syndrome - objective measures of sleep.  
12 *Journal of Psychosomatic Research*, 56(2), 207-212.  
13  
14 (39) Fischler, B., LeBon, O., Hoffmann, G., Cluydts, R., Kaufman, L., & DeMeirleir, K. (1997). Sleep  
15 anomalies in the chronic fatigue syndrome - a comorbidity study. *Neuropsychobiology*, 35(3),  
16 115-122.  
17  
18 (40) Majer, M., Jones, J. F., Unger, E. R., et al. (2007). Perception versus polysomnographic  
19 assessment of sleep in cfs and non-fatigued control subjects: Results from a population-  
20 based study. *BMC Neurology*, 7.  
21  
22 (41) Reeves, W. C., Heim, C., Maloney, E. M., et al. (2006). Sleep characteristics of persons with  
23 chronic fatigue syndrome and non-fatigued controls: Results from a population-based study.  
24 *BMC Neurology*, 6.  
25  
26 (42) Stores, G., Fry, A., & Crawford, C. (1998). Sleep abnormalities demonstrated by home  
27 polysomnography in teenagers with chronic fatigue syndrome. *Journal of Psychosomatic*  
28 *Research*, 45(1), 85-91.  
29  
30 (43) Van Hoof, E., De Becker, P., Lapp, C., Cluydts, R., & De Meirleir, K. (2007). Defining the  
31 occurrence and influence of alpha-delta sleep in chronic fatigue syndrome. *American Journal*  
32 *of the Medical Sciences*, 333(2), 78-84.  
33  
34 (44) Watson, N. F., Kapur, V., Arguelles, et al. (2003). Comparison of subjective and objective  
35 measures of insomnia in monozygotic twins discordant for chronic fatigue syndrome. *Sleep*,  
36 26(3), 324-328.  
37  
38 (45) Le Bon, O., Minner, P., Van Moorsel, C., et al. (2003). First-night effect in the chronic fatigue  
39 syndrome. *Psychiatry Research*, 120(2), 191-199.  
40  
41  
42  
43  
44  
45  
46  
47  
48  
49  
50  
51  
52  
53  
54  
55  
56  
57  
58  
59  
60

- 1  
2  
3  
4  
5  
6  
7 (46) Le Bon, O., Neu, D., Valente, F., & Linkowski, P. (2007). Paradoxical nrems distribution in "pure"  
8 chronic fatigue patients: A comparison with sleep apnea-hypopnea patients and healthy  
9 control subjects. *Journal of Chronic Fatigue Syndrome*, 14(2), 45-60.
- 10  
11  
12 (47) Morriss, R., Sharpe, M., Sharpley, A. L., Cowen, P. J., Hawton, K., & Morris, J. (1993).  
13 Abnormalities of sleep in patients with the chronic fatigue syndrome. *British Medical*  
14 *Journal*, 306(6886), 1161-1164.
- 15  
16  
17 (48) Sharpley, A., Clements, A., Hawton, K., & Sharpe, M. (1997). Do patients with "pure" chronic  
18 fatigue syndrome (neurasthenia) have abnormal sleep? *Psychosomatic Medicine*, 59(6), 592-  
19 596.
- 20  
21  
22 (49) Togo, F., Natelson, B. H., Cherniack, N. S., FitzGibbons, J., Garcon, C., & Rapoport, D. M. (2008).  
23 Sleep structure and sleepiness in chronic fatigue syndrome with or without coexisting  
24 fibromyalgia. *Arthritis Research & Therapy*, 10(3).
- 25  
26  
27 (50) Guilleminault, C., Poyares, D., da Rosa, A., Kirisoglu, C., Almeida, T., & Lopes, M. C. (2006).  
28 Chronic fatigue, unrefreshing sleep and nocturnal polysomnography. *Sleep Medicine*, 7(6),  
29 513-520.
- 30  
31  
32 (51) Rahman, K. B., A. Galbraith, S. Lloyd, A. & Vollmer-Conna, U. (2011). Sleep-wake behavior in  
33 chronic fatigue syndrome. *Sleep*, 34(5), 671-678.
- 34  
35  
36 (52) American Academy of Sleep Medicine. (2007) *The AASM manual for the scoring of sleep and*  
37 *associated events : rules, terminology and technical specifications*. Washington DC. Author.
- 38  
39  
40 (53) Carskadon, M. & Dement, W.C. (2011). Normal human sleep: An overview. Chapter 2 In Kryger,  
41 M.H., Roth, T. & Dement, W.C. *Principles and Practice of Sleep Medicine* (5<sup>th</sup> Edition).  
42 Elsevier: Missouri.
- 43  
44  
45 (54) Edinger, J. D., Bonnet, M. H., Bootzin, R. R., et al. (2004). Derivation of research diagnostic  
46 criteria for insomnia: report of an American Academy of Sleep Medicine Work Group. *Sleep*,  
47 27(8), 1567-1596.
- 48  
49  
50  
51  
52  
53  
54  
55  
56  
57  
58  
59  
60

- 1  
2  
3  
4  
5  
6  
7 (55) Dündar, Y., Dodd, S., Strobl, J., Boland, A., Dickson, R., & Walley, T. (2004). Comparative efficacy  
8 of newer hypnotic drugs for the short-term management of insomnia: a systematic review  
9 and meta-analysis. *Human Psychopharmacology: Clinical and Experimental*, 19(5), 305-322.
- 10  
11 (56) Brandenberger, G., Buchheit, M., Ehrhart, J., Simon, C., & Piquard, F. (2005). Is slow wave sleep  
12 an appropriate recording condition for heart rate variability analysis? *Autonomic*  
13 *Neuroscience*, 121(1), 81-86.
- 14  
15 (57) Dauvilliers, Y. (2006). Differential diagnosis in hypersomnia. *Current neurology and neuroscience*  
16 *reports*, 6(2), 156-162.
- 17  
18 (58) Ohayon, M. M. (2002). Epidemiology of insomnia: what we know and what we still need to  
19 learn. *Sleep medicine reviews*, 6(2), 97-111.
- 20  
21 (59) Buysse, D. J., Cheng, Y., Germain, A., et al. (2010). Night-to-night sleep variability in older adults  
22 with and without chronic insomnia. *Sleep medicine*, 11(1), 56.
- 23  
24 (60) Perlis, M.L., Swinkles, C.M., Gherman, P.R., Pigeon, W.R., Matteson-Rusby, S.E., Jungvist, C. R.  
25 (2009). The incidence and temporal patterning of insomnia: a pilot study. *Journal of Sleep*  
26 *Research*, 19(1), 31-35.
- 27  
28 (61) Vallieres, A., Ivers, H., Beaulieu-Bonneau, S. & Morin, C.M. (2011). Predictability of Sleep in  
29 Patients with Insomnia. *Sleep*, 34(5), 609-617.
- 30  
31 (62) Wohlgemuth, W.K., Edinger, J.D., Fins, A.I. & Sullivan, R.J. (1999). How many nights are enough?  
32 The short-term stability of sleep parameters in elderly insomniacs and normal sleepers.  
33 *Psychophysiology*, 36(2), 233-244.
- 34  
35  
36  
37  
38  
39  
40  
41  
42  
43  
44  
45  
46  
47  
48  
49  
50  
51  
52  
53  
54  
55  
56  
57  
58  
59  
60

Figure 1: Study Overview

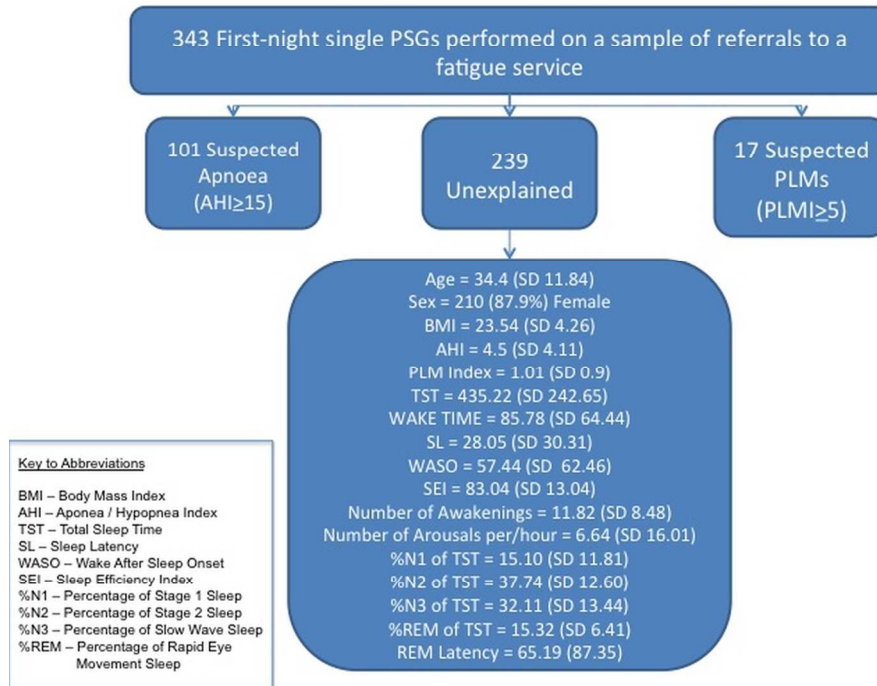

Study Overview  
 119x90mm (300 x 300 DPI)

Review only

STROBE Statement—Checklist of items that should be included in reports of *cross-sectional studies*

|                              | Item No | Recommendation                                                                                                                                                                                                                                                                                                                                                                                                |
|------------------------------|---------|---------------------------------------------------------------------------------------------------------------------------------------------------------------------------------------------------------------------------------------------------------------------------------------------------------------------------------------------------------------------------------------------------------------|
| <b>X Title and abstract</b>  | 1       | (a) Indicate the study's design with a commonly used term in the title or the abstract<br>(b) Provide in the abstract an informative and balanced summary of what was done and what was found                                                                                                                                                                                                                 |
| <b>X Introduction</b>        |         |                                                                                                                                                                                                                                                                                                                                                                                                               |
| Background/rationale         | 2       | Explain the scientific background and rationale for the investigation being reported                                                                                                                                                                                                                                                                                                                          |
| Objectives                   | 3       | State specific objectives, including any prespecified hypotheses                                                                                                                                                                                                                                                                                                                                              |
| <b>X Methods</b>             |         |                                                                                                                                                                                                                                                                                                                                                                                                               |
| Study design                 | 4       | Present key elements of study design early in the paper                                                                                                                                                                                                                                                                                                                                                       |
| Setting                      | 5       | Describe the setting, locations, and relevant dates, including periods of recruitment, exposure, follow-up, and data collection                                                                                                                                                                                                                                                                               |
| Participants                 | 6       | (a) Give the eligibility criteria, and the sources and methods of selection of participants                                                                                                                                                                                                                                                                                                                   |
| Variables                    | 7       | Clearly define all outcomes, exposures, predictors, potential confounders, and effect modifiers. Give diagnostic criteria, if applicable                                                                                                                                                                                                                                                                      |
| Data sources/<br>measurement | 8*      | For each variable of interest, give sources of data and details of methods of assessment (measurement). Describe comparability of assessment methods if there is more than one group                                                                                                                                                                                                                          |
| Bias                         | 9       | Describe any efforts to address potential sources of bias                                                                                                                                                                                                                                                                                                                                                     |
| Study size                   | 10      | Explain how the study size was arrived at                                                                                                                                                                                                                                                                                                                                                                     |
| Quantitative variables       | 11      | Explain how quantitative variables were handled in the analyses. If applicable, describe which groupings were chosen and why                                                                                                                                                                                                                                                                                  |
| Statistical methods          | 12      | (a) Describe all statistical methods, including those used to control for confounding<br>(b) Describe any methods used to examine subgroups and interactions<br>(c) Explain how missing data were addressed<br>(d) If applicable, describe analytical methods taking account of sampling strategy<br>(e) Describe any sensitivity analyses                                                                    |
| <b>X Results</b>             |         |                                                                                                                                                                                                                                                                                                                                                                                                               |
| Participants                 | 13*     | (a) Report numbers of individuals at each stage of study—eg numbers potentially eligible, examined for eligibility, confirmed eligible, included in the study, completing follow-up, and analysed<br>(b) Give reasons for non-participation at each stage<br>(c) Consider use of a flow diagram                                                                                                               |
| Descriptive data             | 14*     | (a) Give characteristics of study participants (eg demographic, clinical, social) and information on exposures and potential confounders<br>(b) Indicate number of participants with missing data for each variable of interest                                                                                                                                                                               |
| Outcome data                 | 15*     | Report numbers of outcome events or summary measures                                                                                                                                                                                                                                                                                                                                                          |
| Main results                 | 16      | (a) Give unadjusted estimates and, if applicable, confounder-adjusted estimates and their precision (eg, 95% confidence interval). Make clear which confounders were adjusted for and why they were included<br>(b) Report category boundaries when continuous variables were categorized<br>(c) If relevant, consider translating estimates of relative risk into absolute risk for a meaningful time period |
| Other analyses               | 17      | Report other analyses done—eg analyses of subgroups and interactions, and sensitivity analyses                                                                                                                                                                                                                                                                                                                |

|                            |    |                                                                                                                                                                            |
|----------------------------|----|----------------------------------------------------------------------------------------------------------------------------------------------------------------------------|
| <b>X Discussion</b>        |    |                                                                                                                                                                            |
| Key results                | 18 | Summarise key results with reference to study objectives                                                                                                                   |
| Limitations                | 19 | Discuss limitations of the study, taking into account sources of potential bias or imprecision. Discuss both direction and magnitude of any potential bias                 |
| Interpretation             | 20 | Give a cautious overall interpretation of results considering objectives, limitations, multiplicity of analyses, results from similar studies, and other relevant evidence |
| Generalisability           | 21 | Discuss the generalisability (external validity) of the study results                                                                                                      |
| <b>X Other information</b> |    |                                                                                                                                                                            |
| Funding                    | 22 | Give the source of funding and the role of the funders for the present study and, if applicable, for the original study on which the present article is based              |

\*Give information separately for exposed and unexposed groups.

**Note:** An Explanation and Elaboration article discusses each checklist item and gives methodological background and published examples of transparent reporting. The STROBE checklist is best used in conjunction with this article (freely available on the Web sites of PLoS Medicine at <http://www.plosmedicine.org/>, Annals of Internal Medicine at <http://www.annals.org/>, and Epidemiology at <http://www.epidem.com/>). Information on the STROBE Initiative is available at [www.strobe-statement.org](http://www.strobe-statement.org).
